# Supplementary material for: Translational coupling via termination-reinitiation in archaea and bacteria
Source: Springer Nature journal article supplement (doi:10.1038/s41467-019-11999-9), 2019-09-05
Supplement: MOESM1 [file 41467_2019_11999_MOESM1_ESM.pdf]

**Supplementary Information:**

**Translational coupling via termination-reinitiation in archaea and bacteria**

**Huber et al. (2019)**

**Nature Communications**

**Supplementary Table 1.** List of overlapping gene pairs with designations and names of upstream and downstream genes and sequences around the overlap. The SD motifs are shown in red, the start codons in blue, and the stop codons in bold.

|                    | Gene Designation | Gene upstream                                        | Sequence (overlap)                                      | Gene Designation | Gene downstream        | Plasmid |
|--------------------|------------------|------------------------------------------------------|---------------------------------------------------------|------------------|------------------------|---------|
| <i>H. volcanii</i> | HVO_0147         | <i>ureB</i>                                          | CGGCACCGC <b>GGAGG</b> GGTTCGAGCGA <b>ATG</b> ACGAAGGAC | HVO_0148         | <i>ureC</i>            | pEK2    |
|                    | HVO_0357         | <i>aa-bin. Prot.</i>                                 | ACCGCTCGC <b>GGAGG</b> GGTCCCA <b>ATG</b> AGCCTCAGACTC  | HVO_0358         | <i>hom1</i>            | pEK3    |
|                    | HVO_2543         | <i>rpl30</i>                                         | CGAACTCCT <b>GGAGGA</b> CATGCG <b>ATG</b> ACGTCCAAGAAG  | HVO_2542         | <i>rpl15</i>           | pEK5    |
|                    | HVO_2551         | <i>rpl5</i>                                          | GTTTCGACGT <b>GGAGG</b> TTGAAGA <b>ATG</b> AGCGATAGCGAA | HVO_2550         | <i>rps15</i>           | pEK6    |
|                    | HVO_1210         | <i>flgA1</i>                                         | ATTGCGCTC <b>TGAGGGA</b> ATTCAA <b>ATG</b> TTCAACAACAT  | HVO_1211         | <i>flgA2</i>           | pEK4    |
|                    | HVO_2431         | <i>glnP</i>                                          | TCGGATTGG <b>GGAGG</b> TGACCGCCG <b>ATG</b> ACGCTCGTC   | HVO_2430         | <i>glnQ</i>            | pIM1    |
|                    | HVO_1594         | <i>cna</i>                                           | CGCCAAACT <b>GGAGG</b> TGACCGC <b>ATG</b> ACGCTCGTCTC   | HVO_1595         | <i>con. hyp. prot.</i> | pIM2    |
|                    | HVO_0685         | <i>hyp. prot.</i>                                    | GCGGCCGAC <b>GGAGG</b> TGAG <b>TGAG</b> ATCGAACTCGTCT   | HVO_0686         | <i>con. hyp. prot.</i> | pIM3    |
| HVO_2555           | <i>rps17</i>     | GAGATTATG <b>GGAGG</b> TGACGAG <b>TGAG</b> GAACTCGTC | HVO_2554                                                | <i>rpl14</i>     | pIM4                   |         |
| <i>E. coli</i>     | b2488            | <i>hyfH</i>                                          | CTGCTGGTGGC <b>TAAGGAG</b> CAGCT <b>ATG</b> AGTCCAGTGC  | b2489            | <i>hyfI</i>            | pMH1    |
|                    | b1746            | <i>astD</i>                                          | GATTTTCCG <b>ATGAGG</b> TGTTGCG <b>ATG</b> AACGCCTGGG   | b1745            | <i>astB</i>            | pMH2    |
|                    | b0775            | <i>bioB</i>                                          | AATATTACAAC <b>GCGGCAGC</b> ATT <b>ATG</b> AGCTGGCAGGA  | b0776            | <i>bioF</i>            | pMH3    |
|                    | b1381            | <i>ybdH</i>                                          | GGAAAAGAGTGT <b>GAGGA</b> AAAACA <b>ATG</b> AAAATTTTAC  | b1382            | <i>ynbE</i>            | pMH4    |
|                    | b2264            | <i>menD</i>                                          | TCTGGCGCAGG <b>TAAGCCA</b> TTT <b>ATG</b> ATCCTGCACGCG  | b2263            | <i>menH</i>            | pMH5    |

**Supplementary Table 2.** Native (wt) and mutated (mut) sequences of analyzed overlapping gene regions in *H. volcanii* and *E. coli*. Shine-Dalgarno regions are underlined, matching nucleotides to the consensus sequence are indicated in red, start codon of downstream gene indicated in blue and stop codon in bold.

|                    | HVO-<br>Nummer    | Gen<br>upstream      |                                                        | Sequence (overlap)                                     |                        | HVO-<br>Nummer         | Gen<br>downstream |
|--------------------|-------------------|----------------------|--------------------------------------------------------|--------------------------------------------------------|------------------------|------------------------|-------------------|
| <i>H. volcanii</i> | HVO_0147          | <i>ureB</i>          | wt                                                     | CGGCACCGC <u>GGAGGGG</u> TCGAGCGA <b>ATC</b> ACGAAGGAC | HVO_0148               | <i>ureC</i>            |                   |
|                    |                   |                      | mut                                                    | CGGCACCGCTAGTAGCGCGAGCGA <b>ATC</b> ACGAAGGAC          |                        |                        |                   |
|                    | HVO_0357          | <i>aa-bin. Prot.</i> | wt                                                     | ACCGCTCGC <u>GGAGGGG</u> TCCCA <b>ATG</b> AGCCTCAGACTC | HVO_0358               | <i>hom1</i>            |                   |
|                    |                   |                      | mut                                                    | ACCGCTCGCTAGTAGCGCCCA <b>ATG</b> AGCCTCAGACTC          |                        |                        |                   |
|                    | HVO_2543          | <i>rpl30</i>         | wt                                                     | CGAACTCCT <u>GGAGG</u> CATGCG <b>ATG</b> ACGTCCAAGAAG  | HVO_2542               | <i>rpl15</i>           |                   |
|                    |                   |                      | mut                                                    | CGAACTCCTTAGTAGCGTGCG <b>ATG</b> ACGTCCAAGAAG          |                        |                        |                   |
|                    | HVO_2551          | <i>rpl5</i>          | wt                                                     | GTTCGACGT <u>GGAGG</u> TTGAAGA <b>ATG</b> AGCGATAGCGAA | HVO_2550               | <i>rps15</i>           |                   |
|                    |                   |                      | mut                                                    | GTTCGACGTTAGTAGCGAAGA <b>ATG</b> AGCGATAGCGAA          |                        |                        |                   |
|                    | HVO_2431          | <i>glnP</i>          | wt                                                     | TCGGATTGG <u>GGAGG</u> TGACCGCCG <b>ATC</b> ACGCTCGTCT | HVO_2430               | <i>glnQ</i>            |                   |
|                    |                   |                      | mut                                                    | TCGGATTGGCTCCTCAGCCGCCG <b>ATC</b> ACGCTCGTCT          |                        |                        |                   |
|                    | HVO_1594          | <i>cna</i>           | wt                                                     | CGCCAAACT <u>GGAGG</u> TGACCGC <b>ATG</b> ACGCTCGTCTCT | HVO_1595               | <i>con. hyp. prot.</i> |                   |
|                    |                   |                      | mut                                                    | CGCCAAACTCTCCTCAGCCGC <b>ATG</b> ACGCTCGTCTCT          |                        |                        |                   |
| HVO_0685           | <i>hyp. prot.</i> | wt                   | GCGGCCGAC <u>GGAGG</u> TGAG <b>TGAGATG</b> GAACTCGTCTC | HVO_0686                                               | <i>con. hyp. prot.</i> |                        |                   |
|                    |                   | mut                  | GCGGCCGACCTCCTCAGG <b>TGAGATG</b> GAACTCGTCTC          |                                                        |                        |                        |                   |
| <i>E. coli</i>     | b2488             | <i>hyfH</i>          | wt                                                     | CTGCTGGTGGC <u>TAAGGAG</u> CAGCT <b>ATG</b> AGTCCAGTGC | b2489                  | <i>hyfI</i>            |                   |
|                    |                   |                      | mut                                                    | CTGCTGGTGGCAAGCTTGCA <b>ATG</b> AGTCCAGTGC             |                        |                        |                   |
|                    | b1746             | <i>astD</i>          | wt                                                     | GATTTTTCCGAT <u>GAGG</u> TGGTGCG <b>ATG</b> AACGCCTGGG | b1745                  | <i>astB</i>            |                   |
|                    |                   |                      | mut                                                    | GATTTTTCCGACACCACCTTGCG <b>ATG</b> AACGCCTGGG          |                        |                        |                   |
|                    | b0775             | <i>bioB</i>          | wt                                                     | AATATTACAAC <u>GCGG</u> CAGCATT <b>ATG</b> AGCTGGCAGGA | b0756                  | <i>bioF</i>            |                   |
|                    |                   |                      | mut                                                    | AATATTACAAATTATTGTTGTT <b>ATG</b> AGCTGGCAGGA          |                        |                        |                   |
|                    | b1381             | <i>ybdH</i>          | wt                                                     | GGAAAAGAGTGT <u>GAGGA</u> AAAACA <b>ATG</b> AAAATTTTAC | b1382                  | <i>ynbE</i>            |                   |
|                    |                   |                      | mut                                                    | GGAAAAGAGTGTGCACCACTGCA <b>ATG</b> AAAATTTTAC          |                        |                        |                   |
|                    | b2264             | <i>menD</i>          | wt                                                     | TCTGGCGCAGG <u>TAAG</u> CCATTT <b>ATG</b> ATCCTGCACGCG | b2263                  | <i>menH</i>            |                   |
|                    |                   |                      | mut                                                    | TCTGGCGCAGGCTGCAGATTT <b>ATG</b> ATCCTGCACGCG          |                        |                        |                   |

**Supplementary Table 3. Oligonucleotides for amplification of overlapping gene pairs.**

| HVO-<br>Number | Gen upstream         |     | Sequence (primer 5'-3' for genepair amplification) | HVO-<br>Number | Gen downstream         |
|----------------|----------------------|-----|----------------------------------------------------|----------------|------------------------|
| HVO_0147       | <i>ureB</i>          | fw  | AATTC AATTGATGACCGGCGAGTTCGTTCC                    | HVO_0148       | <i>ureC</i>            |
|                |                      | rev | CATGCCATGGGAACAGTTCGGTGTCTG                        |                |                        |
| HVO_0357       | <i>aa-bin. Prot.</i> | fw  | AATTC AATTGATGAGCGCACAGGACCTCGA                    | HVO_0358       | <i>hom1</i>            |
|                |                      | rev | CATGCCATGGGGCGACGACCTCG                            |                |                        |
| HVO_2543       | <i>rpl30</i>         | fw  | AATTC AATTGATGCAGGCTATCGTTCAGCT                    | HVO_2542       | <i>rpl15</i>           |
|                |                      | rev | CATGCCATGGACCGCCGCGGTGA                            |                |                        |
| HVO_2551       | <i>rpl5</i>          | fw  | AATTC AATTGATGAGCGAGGCTGACTTCCA                    | HVO_2550       | <i>rps15</i>           |
|                |                      | rev | CATGCCATGGCTGCTTTCGACCCGACG                        |                |                        |
| HVO_1210       | <i>flgA1</i>         | fw  | AATTC AATTGATGTTTCGAAAACATCAACGA                   | HVO_1211       | <i>flgA2</i>           |
|                |                      | rev | CATGCCATGGGATTGCGGCGACCA                           |                |                        |
| HVO_2431       | <i>glnP</i>          | fw  | CGAACTCTGCAGTATGGCAGACACATACTCAGGGG                | HVO_2430       | <i>glnQ</i>            |
|                |                      | rev | CAGAGACGAGCGTCATCGGCGGTACCTCCCAATCC                |                |                        |
| HVO_1594       | <i>cna</i>           | fw  | GAACTCTGCAGTATGAACCCGCTCCAGCGG                     | HVO_1595       | <i>con. hyp. prot.</i> |
|                |                      | rev | CAGAGACGAGCGTCATGCGGTACCTCCAGTTTGGCG               |                |                        |
| HVO_0685       | <i>hyp. prot.</i>    | fw  | CGAACTCTGCAGTATGACAAACGATACCACCTCGG                | HVO_0686       | <i>con. hyp. prot.</i> |
|                |                      | rev | GAGACGAGTTCATCTCACTCACCTCCGTCGGCCGCG               |                |                        |
| HVO_2555       | <i>rps17</i>         | fw  | CGAACTCTGCAGTATGGCGATAGGACTTGACGTTT                | HVO_2554       | <i>rpl14</i>           |
|                |                      | rev | CAGAGACGAGTTCATCACTCGTCACCTCCATAATCTCGACGACGAC     |                |                        |
| b2488          | <i>hyfH</i>          | fw  | CGATCCATGGTTGTGGGCGCAAGCGAGCGTC                    | b2489          | <i>hyfI</i>            |
|                |                      | rev | CGATCTCGAGGCTGACATGTTGTGTAAGCACTGG                 |                |                        |
| b1381          | <i>ybdH</i>          | fw  | CGATCCATGGTTACGCTTTGGCGATAATCTCC                   | b1382          | <i>ynbE</i>            |
|                |                      | rev | GCATCTCGAGTGACGTCAACGCAGCCAG                       |                |                        |
| b0775          | <i>bioB</i>          | fw  | CCAGCCCATGGACTGCCGTGCTGGCAGGGGATAAC                | b0756          | <i>bioF</i>            |
|                |                      | rev | CCAGCCTCGAGCCGCGTTGATTTTCTCCTGCC                   |                |                        |
| b2264          | <i>menD</i>          | fw  | CCAGCCCATGGTGGCGCACGCCAACCACCAC                    | b2263          | <i>menH</i>            |
|                |                      | rev | CCAGCCTCGAGTCCGTGTTTTGCCTGCGCGTG                   |                |                        |
| b1746          | <i>astD</i>          | fw  | CCAGCCCATGTGGTATGCCGAGATTACTGCGCAT                 | b1745          | <i>astB</i>            |
|                |                      | rev | CCAGCCTCGAGCCCGTCGAAATTGACTTCCCAGG                 |                |                        |

**Supplementary Table 4.** Oligonucleotides for mutagenesis of intragenic Shine-Dalgarno sequences

| HVO-<br>Nummer | Gen upstream         |     | Sequence (primer 5'-3' for mutagenesis)           | HVO-<br>Nummer | Gen downstream         |
|----------------|----------------------|-----|---------------------------------------------------|----------------|------------------------|
| HVO_0147       | <i>ureB</i>          | fw  | GACGACGAACACGGCACCCTAGTAGCGCGAGCGAATGACGAAGGAC    | HVO_0148       | <i>ureC</i>            |
|                |                      | rev | GTCCTTCGTCAATTCGCTCGCGCTACTAGCGGTGCCGTGTTTCGTCGTC |                |                        |
| HVO_0357       | <i>aa-bin. Prot.</i> | fw  | CACGTCGTGAAACCGCTCGCTAGTAGCGCCCAATGAGCCTCAGACTCG  | HVO_0358       | <i>hom1</i>            |
|                |                      | rev | CGAGTCTGAGGCTCATTGGCGCTACTAGCGAGCGGTTCGACGACGTG   |                |                        |
| HVO_2543       | <i>rpl30</i>         | fw  | GAACAGATCGACGAACTCCTTAGTAGCGTGCGATGACGTCCAAGAAGC  | HVO_2542       | <i>rpl15</i>           |
|                |                      | rev | GCTTCTTGGACGTCAATCGCACGCTACTAAGGAGTTCGTCGATCTGTTC |                |                        |
| HVO_2551       | <i>rpl5</i>          | fw  | CGAGTCCACGTTTCGACGTTAGTAGCGAAGAATGAGCGATAGCGAAAC  | HVO_2550       | <i>rps15</i>           |
|                |                      | rev | CGCTATCGCTCATTCTTCGCTACTAACGTCGAACGTGGACTCGATG    |                |                        |
| HVO_1210       | <i>flgA1</i>         | fw  | ACAACGACCCCATTTGCGCTCTAGTAGCGTTCAAATGTTCAACAACATC | HVO_1211       | <i>flgA2</i>           |
|                |                      | rev | TTGTTGAACATTTGAACGCTACTAGAGCGCAATGGGGTCTGTTGTGTC  |                |                        |
| HVO_2431       | <i>glnP</i>          | fw  | GCTCGGATTGGCTCCTCAGCCGCCGATGACGCTC                | HVO_2430       | <i>glnQ</i>            |
|                |                      | rev | ACGAGCGTCATCGGGCGCTGAGGAGCCAATCCGAGCG             |                |                        |
| HVO_1594       | <i>cna</i>           | fw  | AGCGTCATGCGGCTGAGGAGAGTTTGGCGGTGAAGAAG            | HVO_1595       | <i>con. hyp. prot.</i> |
|                |                      | rev | CACCGCCAAACTCTCCTCAGCCGCATGACGCTCGTCTC            |                |                        |
| HVO_0685       | <i>hyp. prot.</i>    | fw  | GTTCCATCTCACCTGAGGAGTTCGGCCGGCGGTGTC              | HVO_0686       | <i>con. hyp. prot.</i> |
|                |                      | rev | GCCGGCCGACCTCCTCAGGTGAGATGGAACCTCGTC              |                |                        |
| HVO_2555       | <i>rps17</i>         | fw  | GTTCCATCACTCGCTGAGGAGCATAATCTCGACGACGAC           | HVO_2554       | <i>rpl14</i>           |
|                |                      | rev | CGTCGAGATTATGCTCCTCAGCGAGTGATGGAACCTCGTC          |                |                        |
| b2488          | <i>hyfH</i>          | fw  | GATGTACTGCTGGTGGGCAGAACCAACCTATGAGTCCAGTG         | b2489          | <i>hyfI</i>            |
|                |                      | rev | CACTGGACTCATAGGTTGGCTGCCACCAGCAGTACATC            |                |                        |
| b1381          | <i>ybdH</i>          | fw  | GCAAGGAAAAGAGTGTGCACCCTGCACAATGAAAATTTTACTG       | b1382          | <i>ynbE</i>            |
|                |                      | rev | CGTTCCTTTTCTCACACGTGGTGACGTGTTACTTTTAAAATGAC      |                |                        |
| b0775          | <i>bioB</i>          | fw  | CGACGAATATTACACATTATTGTTGTTATGAGCTGGCAGG          | b0756          | <i>bioF</i>            |
|                |                      | rev | CCTGCCAGCTCATAACAACAATAATGTGTAATATTCGTCG          |                |                        |
| b2264          | <i>menD</i>          | fw  | GCAACTTCTGGCGCAGGGCTGCTAGATTATGATCCTGCACG         | b2263          | <i>menH</i>            |
|                |                      | rev | CGTGCAGGATCATAATCTAGCAGCCCTGCCAGAAAGTTGC          |                |                        |
| b1746          | <i>astD</i>          | fw  | GGCTGGATTTTTCCGACACCACCTTGCGATGAACGCCTGG          | b1745          | <i>astB</i>            |
|                |                      | rev | CCGACCTAAAAAGGCTGTGGTGGAAACGCTACTTGGCGGACC        |                |                        |

**Supplementary Table 5.** Oligonucleotides for amplification of dig-dUTP labeled probes for northern blot analysis of the reporter genes.

| Reporter gene |     | Sequence (primer 5'-3' for probe amplification) |
|---------------|-----|-------------------------------------------------|
| <i>dhfr</i>   | fw  | ATGACGCTCGTCTCTGTCGCCGCGCTC                     |
|               | rev | AGGTCGTCGCGCATCGACTC                            |
| <i>glpD</i>   | fw  | CGCGGTTTATCCGTGCTGATGCTGGAGG                    |
|               | rev | GCCGGTATCGATATCTTCCGCTTCCACAATCCAC              |
| <i>gusA</i>   | fw  | GGGTGGACGATATCACCGTGGTGACG                      |
|               | rev | CAATCACCACGATGCCATGTTTCATCTGC                   |

**Supplementary Figure 1. Fractions of leading genes in 720 genomes of 24 groups of prokaryotes.** Fractions of leading genes (monocistronic genes or first genes in operons). Mean values and standard deviations are shown.

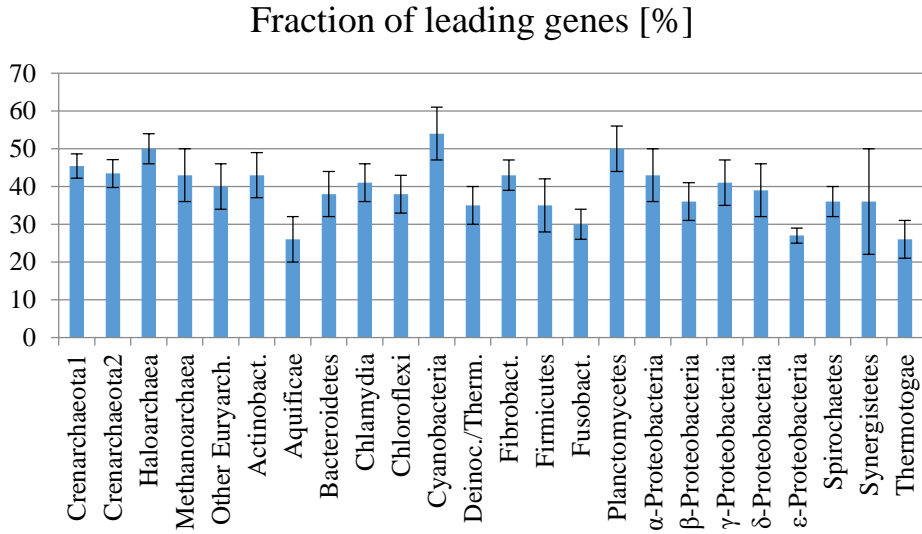

Supplementary Figure 2. (legend see next page)

A

Fraction of overlapping gene pairs with strong SD [%]

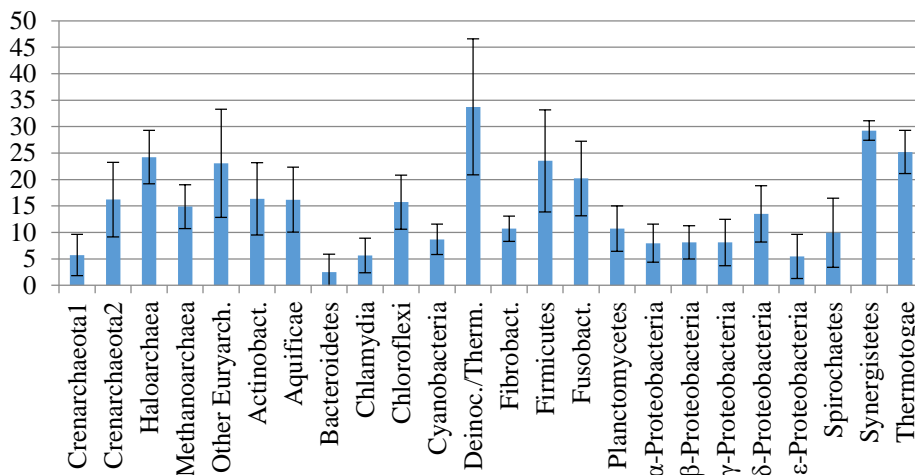

B

Fraction of leading genes with strong SD [%]

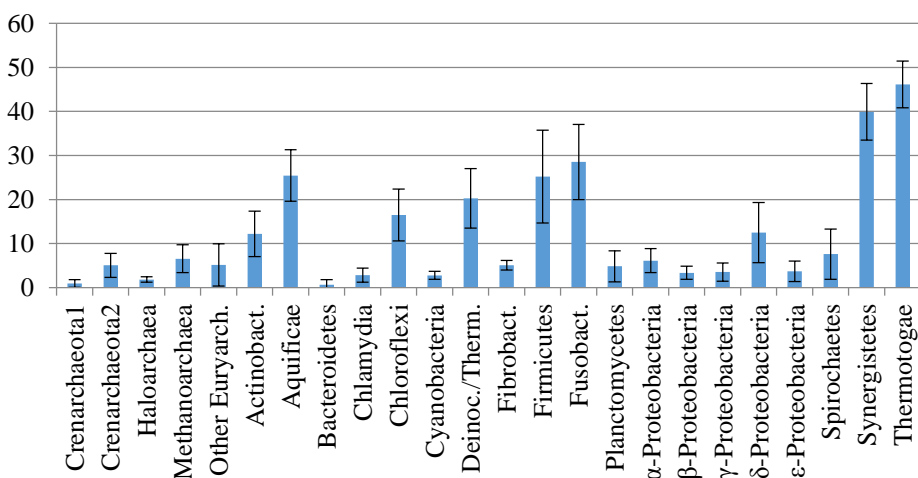

C

Quotient

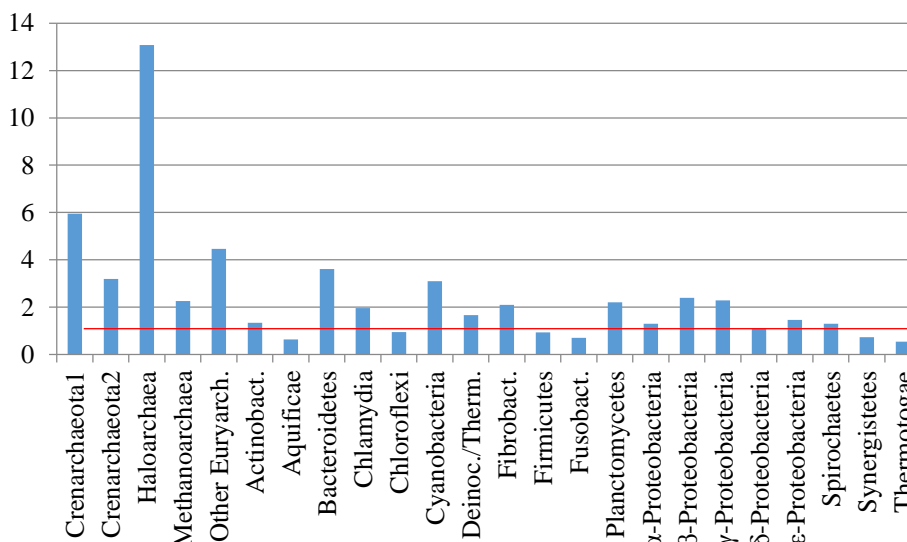



**Supplementary Figure 2. Fractions of genes preceded by strong SD motifs with interaction energies of less than -8.4 kcal/mol.**

**A.** Fractions of overlapping gene pairs with strong SD motifs in the 3'-region of the upstream gene.

**B.** Fractions of leading genes that are preceded by a strong SD motif. Average values and standard deviations are shown.

**C.** Quotients of the values shown in A and B. Values greater than one indicate that the strong SD motif is more important at overlapping gene pairs, values smaller than one indicate that the strong SD motif is more important at leading genes. Red horizontal line highlights a quotient value of one.

**Supplementary Figure 3. A.** Reporter enzyme activities and **B.** transcript levels used to calculate the translational efficiencies shown in Figures 4B and 4D.

**A**

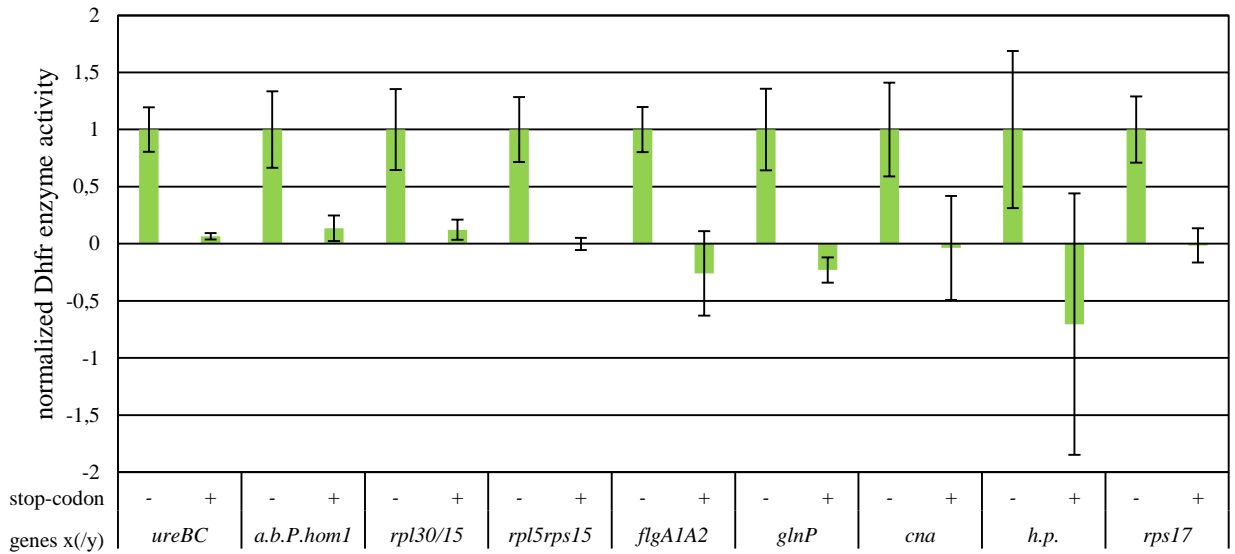

**B**

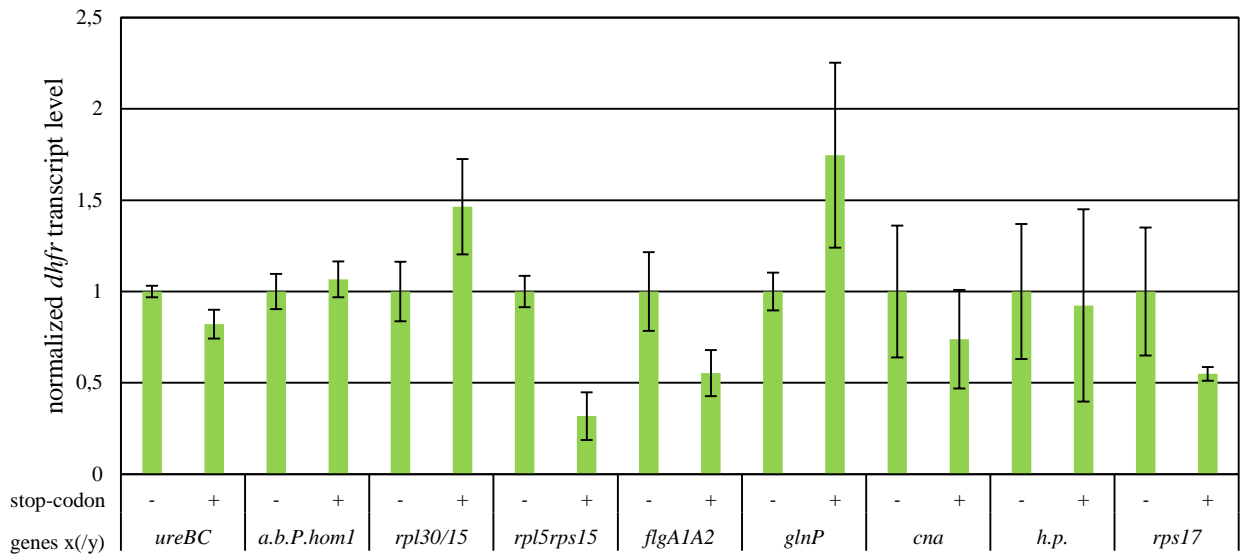

**Supplementary Figure 4.** Reporter enzyme activities (**A. C.**) and transcript levels (**B. D.**) used to calculate the translational efficiencies shown in Figures 4F and 4G.

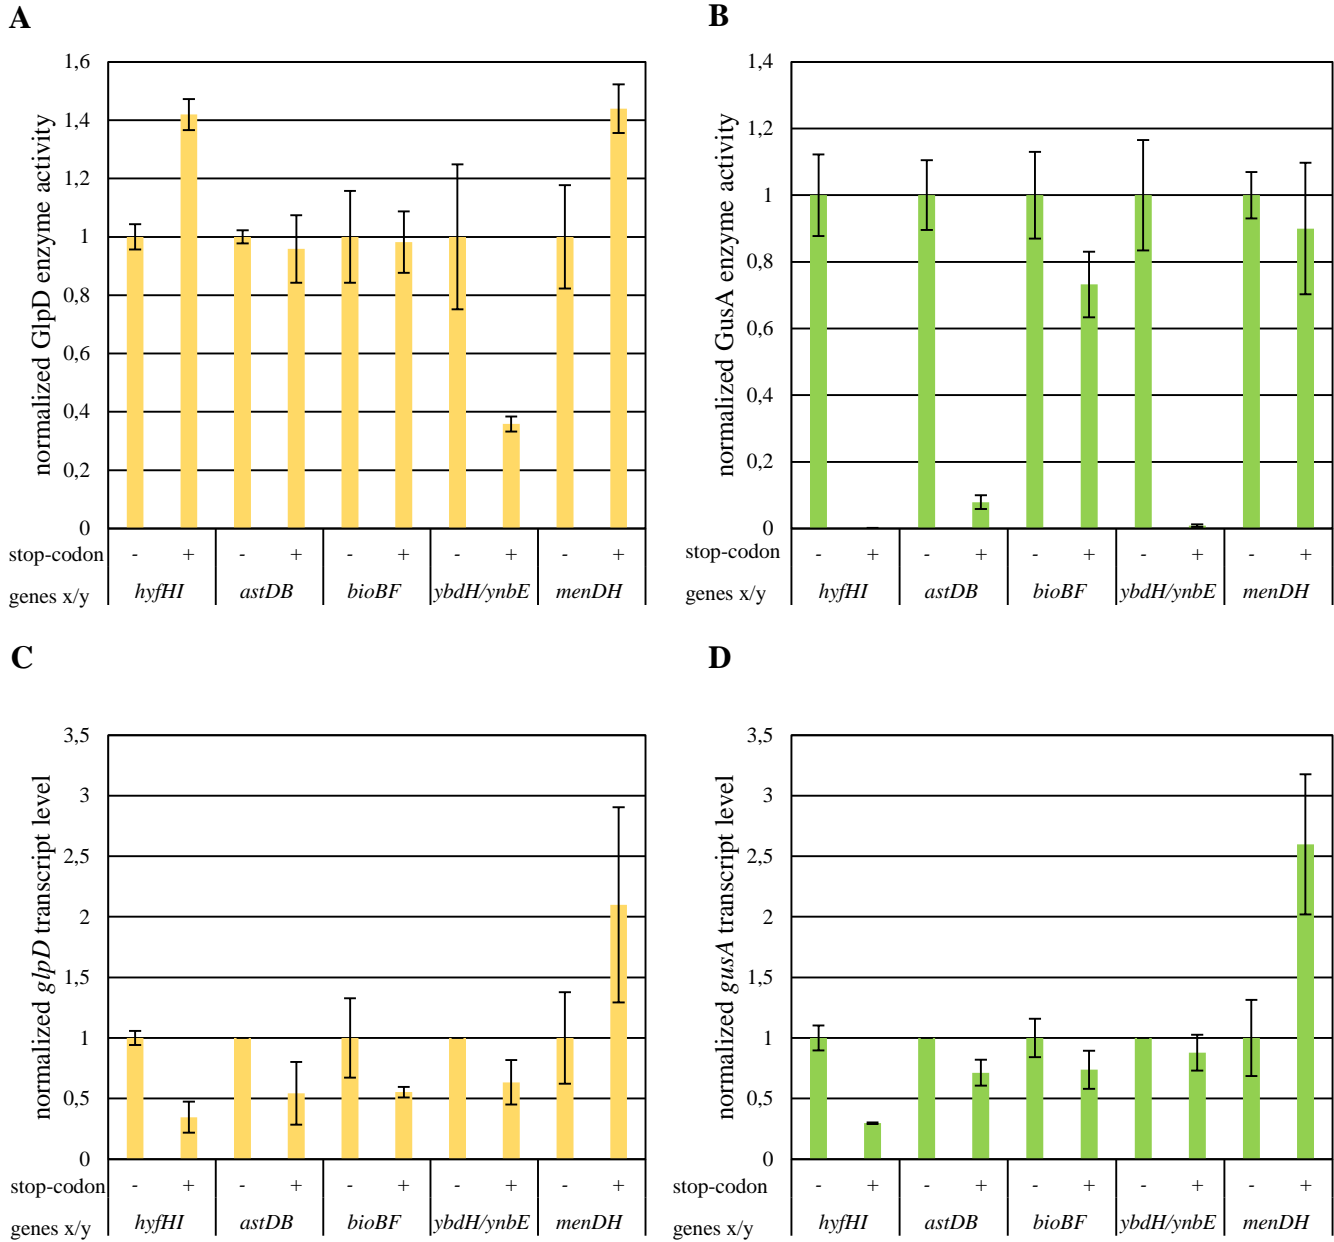

**Supplementary Figure 5. A.** Reporter enzyme activities and **B.** transcript levels used to calculate the translational efficiencies shown in Figures 5B and 5D.

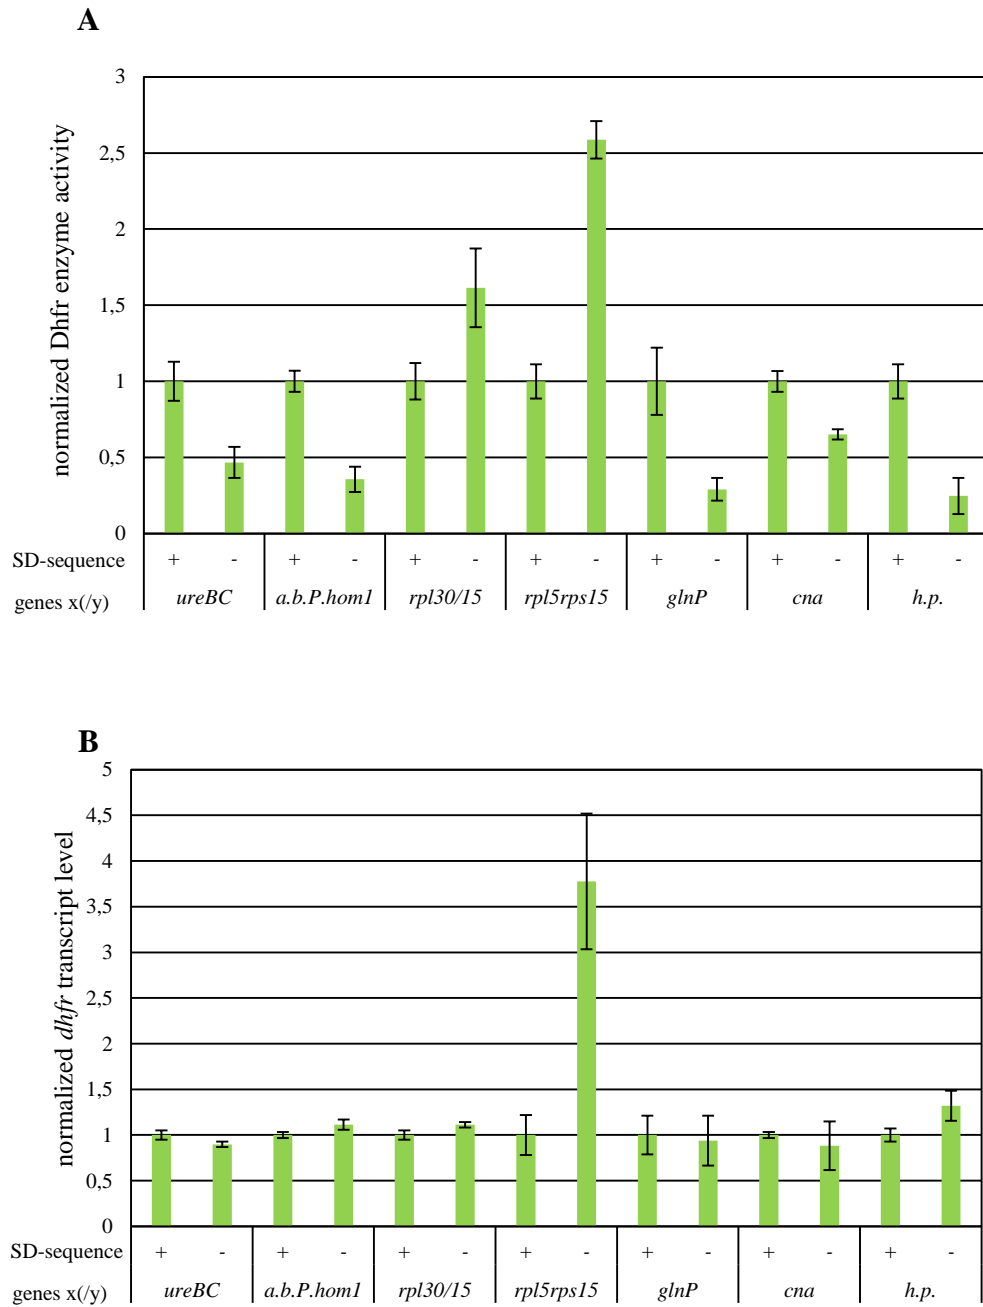

**Supplementary Figure 6.** Reporter enzyme activities (**A. C.**) and transcript levels (**B. D.**) used to calculate the translational efficiencies shown in Figures 5F and 5G.

**A**

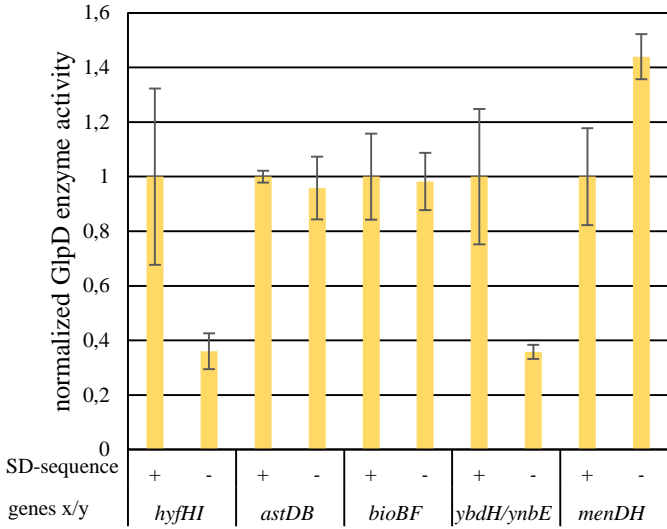

**B**

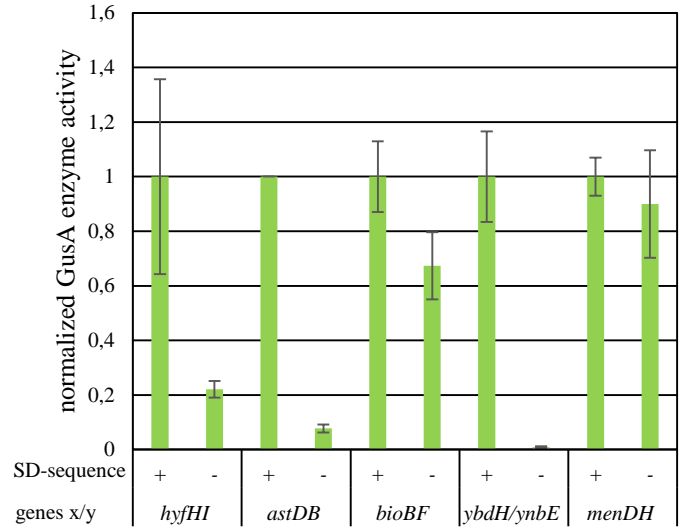

**C**

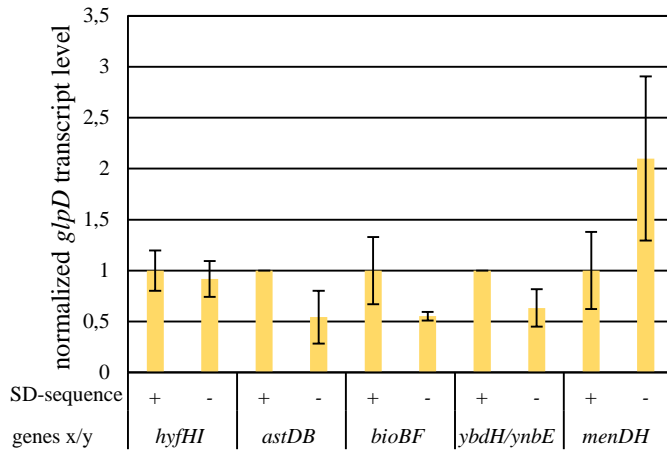

**D**

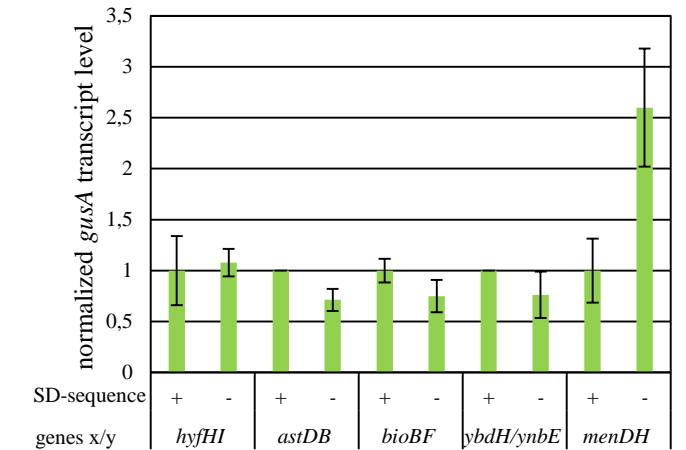

**Supplementary Figure 7.** *In silico* predicted structures of the cloned regions of the five overlapping gene pairs. The overlaps are boxed. The gene names are indicated.

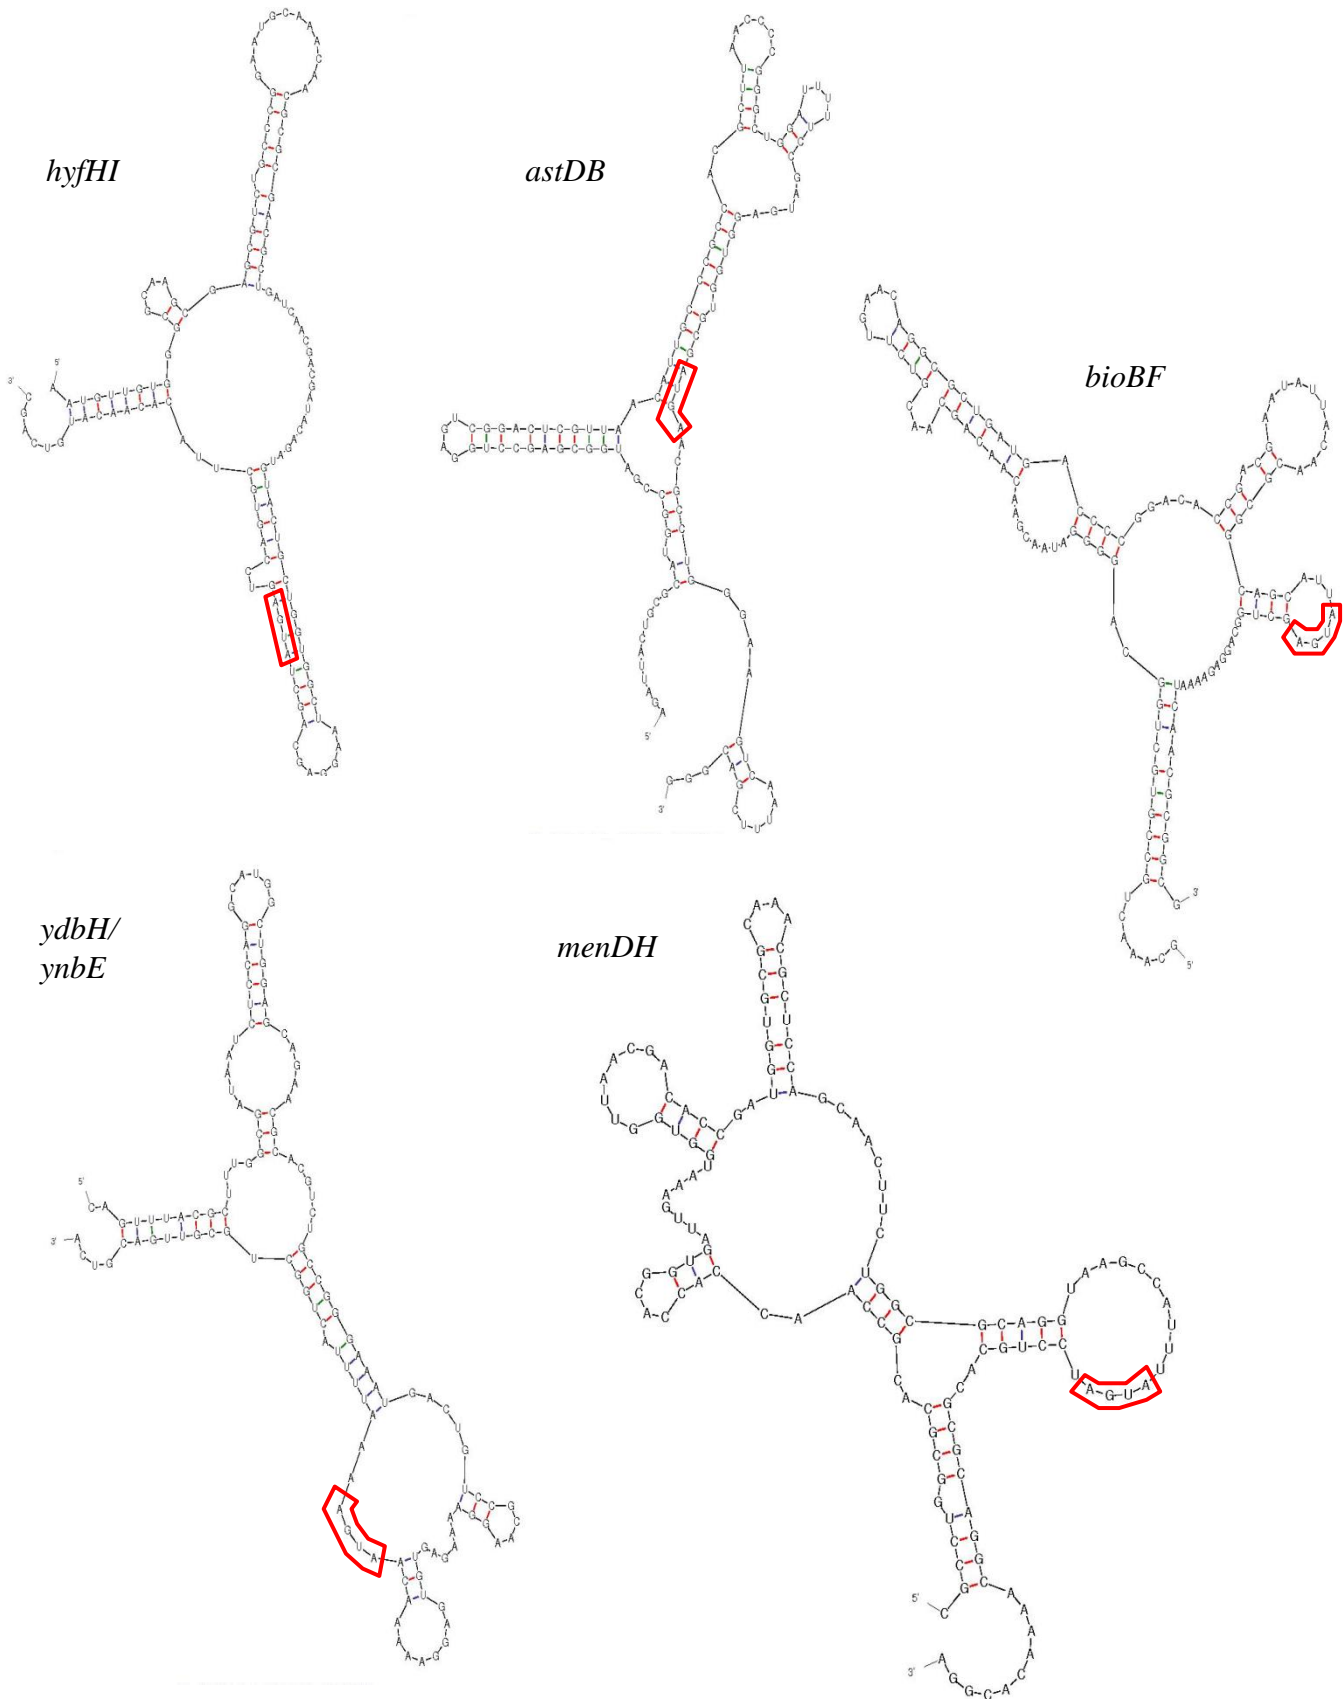

Supplementary Figure 8. Figure legend see next page.

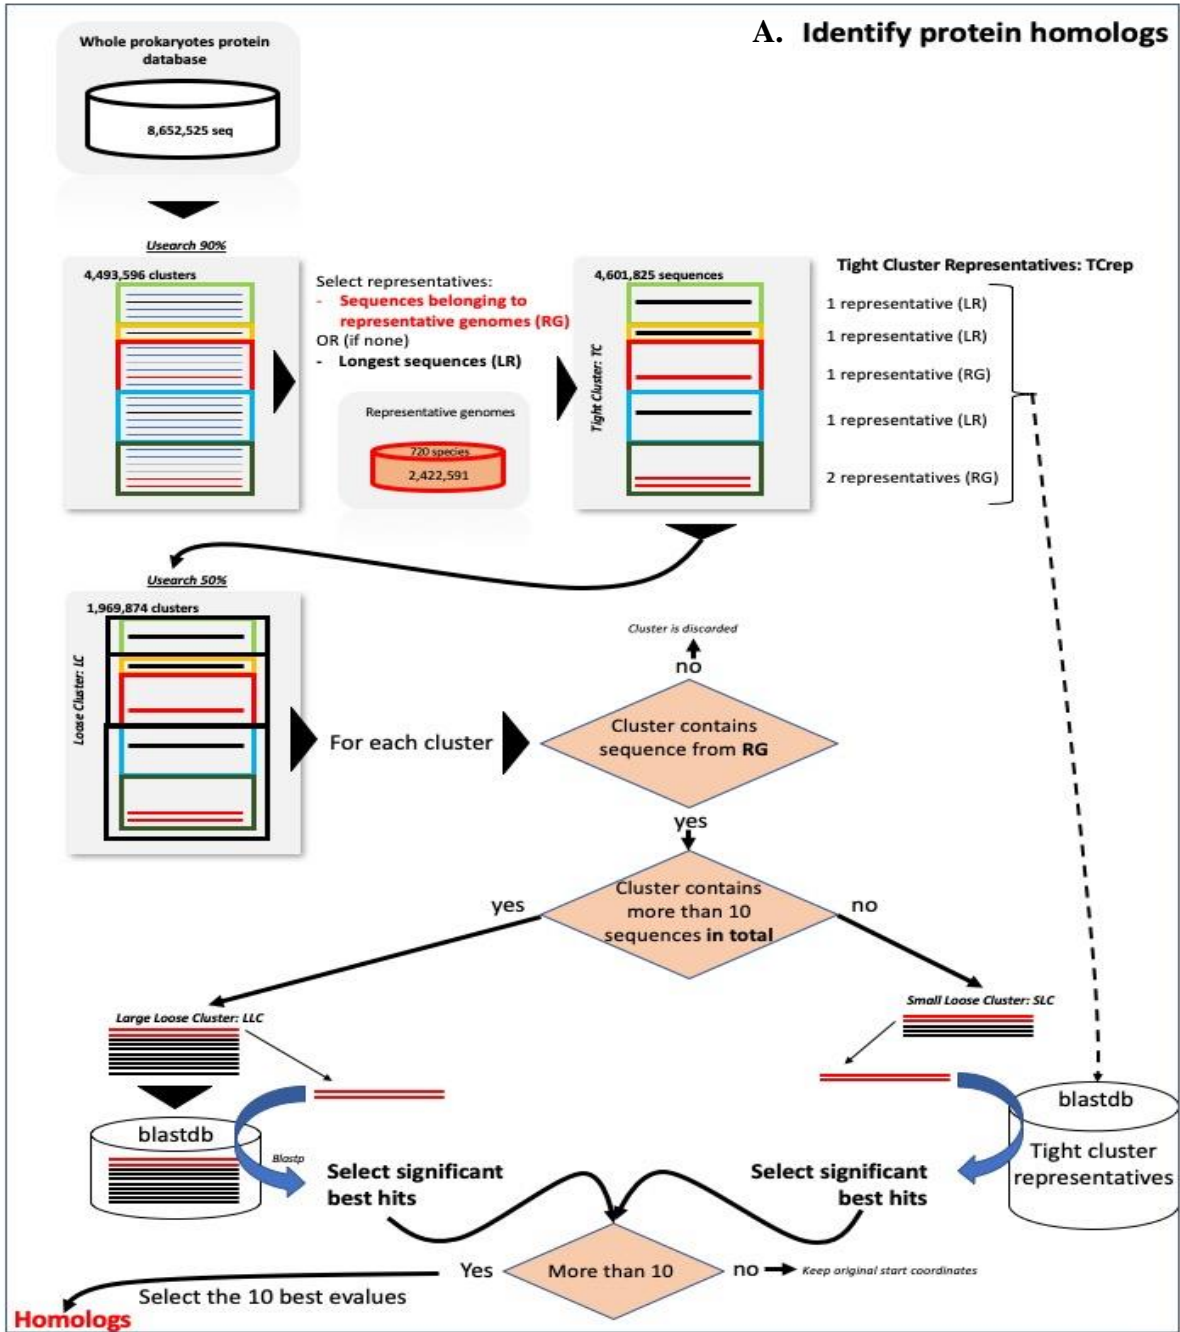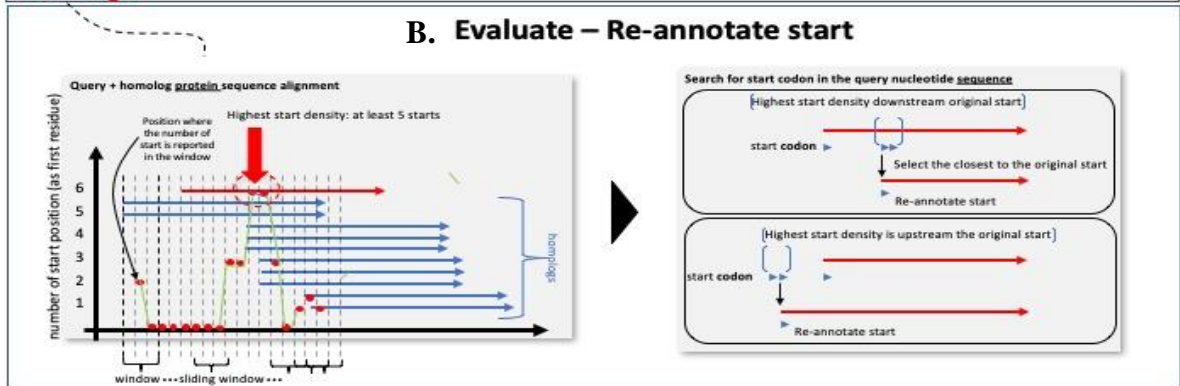

## Supplementary Figure 8.

**A. Identify protein homologs.** Proteins are shown as red lines for protein sequences from the set of representative genomes and black lines for other prokaryotic proteins.

Tight clusters (TC) are embedded into bordered colored rectangles. Tight Cluster representatives (TCrep) can be either sequences from the representative genomes (RG) or the longest sequence of the Tight cluster (TC) when RG is not represented in the respective cluster. Loose clusters (LC) are indicated by bordered back rectangles containing one or several TC (colored rectangles).

The criteria employed to select protein clusters for further analysis are specified in diamonds. Curved blue arrows indicated blastp procedures. Horizontal cylinders indicate protein sequence databases or blast databases (blastdb).

**B. Evaluate – Re-annotate start.** To the left, density of potential protein starts (the first residue of the respective protein) in each 3 position window of the protein alignments between the query (red arrow) and the homologous proteins (blue arrows).

The red dots indicated the number of protein starts throughout the alignment and within a specific window. The thick vertical arrow indicates the position in the alignment with the highest protein start density among the homologous proteins. Right, start reannotation strategies.

For each panel, top vertical arrow represents the original query nucleotide sequence, and the bottom arrow is the corrected start in the query nucleotide sequence. Brackets show the position with the highest protein start density mapped on the nucleotide sequence of the query; blue triangles represent the start codon positions of the query nucleotide sequence in frame with the original, annotated start codon position.
