# Supplementary material for: Translational coupling via termination-reinitiation in archaea and bacteria
Source: Nat Commun. 2019 Sep 5;10:4006. doi: 10.1038/s41467-019-11999-9 (PMC6728339; doi:10.1038/s41467-019-11999-9)
Supplement: Supplementary file 4 — Supplementary Data 1 [file 41467_2019_11999_MOESM4_ESM.xlsx]

## Sheet: Tabelle1
	domain	phylum	species and identifier	nb.chromosome	nb.nt	nb.coding.gene	fraction leading		fraction leading SD		fraction leading + strong SD		fraction overlapping		fraction overl with SD		fraction overlapping + strong SD
1	Archaea	Crenarchaeota	Acidianus_hospitalis_W1_uid66875	1	2137654	2329	0.467583		0.0936639		0.00183655		0.200086		0.521459		0.0236052
2	Archaea	Crenarchaeota	Caldivirga_maquilingensis_IC_167_uid58711	1	2077567	1963	0.509934		0.206793		0.025974		0.106979		0.77619		0.119048
3	Archaea	Crenarchaeota	Metallosphaera_sedula_DSM_5348_uid58717	1	2191517	2256	0.423759		0.134937		0.00732218		0.231826		0.680688		0.0325048
4	Archaea	Crenarchaeota	Pyrobaculum_aerophilum_IM2_uid57727	1	2222430	2600	0.441154		0.1517		0.00610288		0.222308		0.371972		0.0397924
5	Archaea	Crenarchaeota	Sulfolobus_acidocaldarius_DSM_639_uid58379	1	2225959	2223	0.478183		0.0931326		0.00376294		0.204678		0.569231		0.0153846
6	Archaea	Crenarchaeota	Sulfolobus_solfataricus_P2_uid57721	1	2992245	2971	0.492427		0.127136		0.00136705		0.199933		0.521886		0.013468
7	Archaea	Crenarchaeota	Thermofilum_1910b_uid215374	1	1750259	1895	0.407916		0.191462		0.00905563		0.151451		0.658537		0.0905923
8	Archaea	Crenarchaeota	Thermoproteus_tenax_Kra_1_uid74443	1	1841542	2046	0.431085	Average 1-9	0.174603		0.0238095		0.231183		0.353066		0.0676533
9	Archaea	Crenarchaeota	Vulcanisaeta_distributa_DSM_14429_uid52827	1	2374137	2493	0.436422	0.454273	0.133272	0.145189	0.00735294	0.00962041	0.123947	0.185821	0.702265	0.57281	0.113269	0.0572574
10	Archaea	Crenarchaeota	Acidilobus_saccharovorans_345_15_uid51395	1	1496453	1499	0.444963	0.0323372	0.476762	0.0376852	0.0284858	0.00853036	0.127418	0.0440825	0.863874	0.137831	0.193717	0.0392932
11	Archaea	Crenarchaeota	Aeropyrum_pernix_K1_uid57757	1	1669696	1699	0.421424	standard	0.819832		0.099162		0.128899		0.899543		0.273973
12	Archaea	Crenarchaeota	Caldisphaera_lagunensis_DSM_15908_uid183486	1	1546846	1478	0.446549	deviation 1-9	0.59697		0.0378788		0.129905		0.786458		0.114583
13	Archaea	Crenarchaeota	Desulfurococcus_kamchatkensis_1221n_uid59133	1	1365223	1470	0.42449		0.567308		0.0304487		0.161224		0.763713		0.164557
14	Archaea	Crenarchaeota	Fervidicoccus_fontis_Kam940_uid162201	1	1319206	1385	0.422383		0.439316		0.0222222		0.140794		0.620513		0.0974359
15	Archaea	Crenarchaeota	Hyperthermus_butylicus_DSM_5456_uid57755	1	1667163	1601	0.52842		0.695035		0.0910165		0.0918176		0.802721		0.231293
16	Archaea	Crenarchaeota	Ignicoccus_hospitalis_KIN4_I_uid58365	1	1297538	1432	0.435056		0.695024		0.0850722		0.175978		0.813492		0.190476
17	Archaea	Crenarchaeota	Ignisphaera_aggregans_DSM_17230_uid51875	1	1875953	1930	0.435233		0.433333		0.0178571		0.131606		0.633858		0.0393701
18	Archaea	Crenarchaeota	Pyrolobus_fumarii_1A_uid73415	1	1843267	1965	0.461578		0.624035		0.0738699		0.133333		0.790076		0.209924
19	Archaea	Crenarchaeota	Staphylothermus_hellenicus_DSM_12710_uid45893	1	1580347	1599	0.433396		0.722944		0.044733		0.13571		0.801843		0.0506912
20	Archaea	Crenarchaeota	Thermogladius_1633_uid167488	1	1356318	1413	0.375796		0.555556		0.0376648		0.187544		0.784906		0.150943
21	Archaea	Crenarchaeota	Thermosphaera_aggregans_DSM_11486_uid48993	1	1316595	1387	0.382841	0.434344	0.612053	0.603181	0.039548	0.0506633	0.170872	0.142925	0.814346	0.781279	0.227848	0.162068
22	Archaea	Euryarchaeota	Halalkalicoccus_jeotgali_B3_uid50305	7	3698650	3872	0.490444	0.0369046	0.222749	0.113263	0.0205371	0.0273553	0.125	0.0253223	0.665289	0.0773664	0.188017	0.0705704
23	Archaea	Euryarchaeota	Haloarcula_hispanica_ATCC_33960_uid72475	3	3890005	3859	0.477585		0.2051		0.0217037		0.126717		0.693252		0.267894
24	Archaea	Euryarchaeota	Haloarcula_hispanica_N601_uid230920	4	3901495	3918	0.47269		0.200324		0.0242981		0.130934		0.692008		0.267057
25	Archaea	Euryarchaeota	Haloarcula_marismortui_ATCC_43049_uid57719	9	4274642	4243	0.501061		0.195202		0.0268109		0.127975		0.653775		0.246777
26	Archaea	Euryarchaeota	Halobacterium_NRC_1_uid57769	3	2571010	2617	0.49828		0.182515		0.00920245		0.134505		0.553977		0.193182
27	Archaea	Euryarchaeota	Halobacterium_salinarum_R1_uid61571	5	2668776	2749	0.471444		0.184414		0.00848765		0.141142		0.585052		0.198454
28	Archaea	Euryarchaeota	Haloferax_mediterranei_ATCC_33500_uid167315	4	3904707	3860	0.510881		0.210446		0.0273834		0.119171		0.695652		0.28913
29	Archaea	Euryarchaeota	Haloferax_volcanii_DS2_uid46845	5	4012900	4015	0.46675		0.233725		0.0218783		0.133998		0.713755		0.32342
30	Archaea	Euryarchaeota	Halogeometricum_borinquense_DSM_11551_uid54919	6	3944467	3898	0.48666		0.204533		0.0231945		0.122627		0.725941		0.286611
31	Archaea	Euryarchaeota	Halomicrobium_mukohataei_DSM_12286_uid59107	2	3332349	3349	0.458943		0.225114		0.0195185		0.137056		0.690632		0.261438
32	Archaea	Euryarchaeota	Halopiger_xanaduensis_SH_6_uid68105	4	4355268	4221	0.510543		0.217169		0.0143852		0.0978441		0.789346		0.312349
33	Archaea	Euryarchaeota	Haloquadratum_walsbyi_C23_uid162019	4	3260476	2652	0.614253		0.131369		0.0092081		0.111237		0.637288		0.118644
34	Archaea	Euryarchaeota	Haloquadratum_walsbyi_DSM_16790_uid58673	2	3179361	2643	0.618237		0.140759		0.00856793		0.105562		0.65233		0.132616
35	Archaea	Euryarchaeota	Halorhabdus_tiamatea_SARL4B_uid214082	2	3146160	3021	0.487587		0.210455		0.0230821		0.117511		0.667606		0.247887
36	Archaea	Euryarchaeota	Halorhabdus_utahensis_DSM_12940_uid59189	1	3116795	2998	0.449967		0.217198		0.033358		0.133089		0.666667		0.263158
37	Archaea	Euryarchaeota	Halorubrum_lacusprofundi_ATCC_49239_uid58807	3	3692576	3560	0.476966		0.227915		0.01649		0.129213		0.715217		0.221739
38	Archaea	Euryarchaeota	Haloterrigena_turkmenica_DSM_5511_uid43501	7	5440782	5113	0.545277		0.209828		0.01901		0.099159		0.739645		0.268245
39	Archaea	Euryarchaeota	Halovivax_ruber_XH_70_uid184819	1	3223876	3099	0.503066		0.22322		0.020526		0.109713		0.729412		0.270588
40	Archaea	Euryarchaeota	Natrialba_magadii_ATCC_43099_uid46245	4	4443643	4212	0.538936		0.172247		0.0118943		0.108974		0.75817		0.270153
41	Archaea	Euryarchaeota	Natrinema_J7_uid171337	2	3793615	4302	0.498605		0.192541		0.0130536		0.124593		0.610075		0.188433
42	Archaea	Euryarchaeota	Natrinema_pellirubrum_DSM_15624_uid74437	3	4354100	4198	0.520486		0.219222		0.0183066		0.102906		0.696759		0.240741
43	Archaea	Euryarchaeota	Natronobacterium_gregoryi_SP2_uid74439	1	3788356	3656	0.537473		0.193384		0.0132316		0.122265		0.704698		0.252796
44	Archaea	Euryarchaeota	Natronococcus_occultus_SP4_uid184863	3	4314118	4154	0.503611		0.210803		0.0162524		0.102792		0.71897		0.262295
45	Archaea	Euryarchaeota	Natronomonas_moolapensis_8_8_11_uid190182	1	2912573	2749	0.487086		0.209111		0.0209111		0.136049		0.668449		0.18984
46	Archaea	Euryarchaeota	Natronomonas_pharaonis_DSM_2160_uid58435	3	2749696	2820	0.442199	0.502761	0.19166	0.20124	0.021652	0.0185177	0.151418	0.122058	0.662763	0.683469	0.29274	0.242168
47	Archaea	Euryarchaeota	Methanobacterium_AL_21_uid63623	1	2583753	2493	0.466907	0.0421004	0.616838	0.0243455	0.11512	0.00629654	0.0730044	0.0139409	0.785714	0.0511411	0.148352	0.0504972
48	Archaea	Euryarchaeota	Methanobrevibacter_ruminantium_M1_uid45857	1	2937203	2217	0.59585		0.539743		0.0635882		0.0342806		0.723684		0.105263
49	Archaea	Euryarchaeota	Methanocaldococcus_jannaschii_DSM_2661_uid57713	3	1739927	1771	0.39074		0.651734		0.0462428		0.094297		0.60479		0.0838323
50	Archaea	Euryarchaeota	Methanocella_arvoryzae_MRE50_uid61623	1	3179916	3089	0.473292		0.351573		0.0369357		0.0977663		0.741722		0.182119
51	Archaea	Euryarchaeota	Methanococcoides_burtonii_DSM_6242_uid58023	1	2575032	2273	0.441267		0.44666		0.0568295		0.100308		0.741228		0.162281
52	Archaea	Euryarchaeota	Methanococcus_maripaludis_S2_uid58035	1	1661137	1722	0.355981		0.714519		0.0636215		0.0505226		0.678161		0.091954
53	Archaea	Euryarchaeota	Methanocorpusculum_labreanum_Z_uid58785	1	1804962	1741	0.379667		0.226929		0.0226929		0.215968		0.680851		0.162234
54	Archaea	Euryarchaeota	Methanoculleus_bourgensis_MS2_uid171377	1	2789773	2616	0.471713		0.439222		0.0648298		0.182722		0.746862		0.240586
55	Archaea	Euryarchaeota	Methanohalobium_evestigatum_Z_7303_uid49857	2	2406232	2254	0.409051		0.463124		0.0704989		0.0816327		0.733696		0.168478
56	Archaea	Euryarchaeota	Methanohalophilus_mahii_DSM_5219_uid47313	1	2012424	1987	0.375944		0.477912		0.0548862		0.10921		0.778802		0.202765
57	Archaea	Euryarchaeota	Methanolobus_psychrophilus_R15_uid177925	1	3072769	3165	0.455292		0.414296		0.03678		0.0985782		0.721154		0.153846
58	Archaea	Euryarchaeota	Methanomassiliicoccus_Mx1_Issoire_uid207287	1	1931651	1820	0.42033		0.352941		0.0313725		0.181868		0.743202		0.178248
59	Archaea	Euryarchaeota	Methanomethylovorans_hollandica_DSM_15978_uid184864	2	2714013	2556	0.406103		0.477842		0.0520231		0.121283		0.754839		0.16129
60	Archaea	Euryarchaeota	Methanoplanus_petrolearius_DSM_11571_uid52695	1	2843290	2785	0.391741		0.376719		0.0531622		0.163375		0.76044		0.208791
61	Archaea	Euryarchaeota	Methanopyrus_kandleri_AV19_uid57883	1	1694969	1687	0.423829		0.695105		0.106294		0.17783		0.733333		0.153333
62	Archaea	Euryarchaeota	Methanoregula_formicicum_SMSP_uid184406	1	2820858	2816	0.40625		0.350524		0.0524476		0.161577		0.740659		0.18022
63	Archaea	Euryarchaeota	Methanosaeta_concilii_GP6_uid66207	2	3026645	2850	0.461404		0.430418		0.0813688		0.112632		0.741433		0.127726
64	Archaea	Euryarchaeota	Methanosalsum_zhilinae_DSM_4017_uid68249	1	2138444	1976	0.404858		0.49375		0.0725		0.090587		0.793296		0.128492
65	Archaea	Euryarchaeota	Methanosarcina_acetivorans_C2A_uid57879	1	5751492	4540	0.612115		0.4095		0.0510975		0.0905286		0.659367		0.163017
66	Archaea	Euryarchaeota	Methanosphaera_stadtmanae_DSM_3091_uid58407	1	1767403	1534	0.459583		0.550355		0.0836879		0.0625815		0.666667		0.0729167
67	Archaea	Euryarchaeota	Methanosphaerula_palustris_E1_9c_uid59193	1	2922917	2655	0.435782		0.394123		0.0337079		0.183804		0.737705		0.17623
68	Archaea	Euryarchaeota	Methanospirillum_hungatei_JF_1_uid58181	1	3544738	3131	0.426381		0.274157		0.023221		0.185244		0.643103		0.146552
69	Archaea	Euryarchaeota	Methanothermobacter_thermautotrophicus_Delta_H_uid57877	1	1751377	1871	0.312133		0.582192		0.119863		0.128808		0.788382		0.174274
70	Archaea	Euryarchaeota	Methanothermococcus_okinawensis_IH1_uid51535	2	1677455	1595	0.413793		0.665152		0.0606061		0.0476489		0.75		0.105263
71	Archaea	Euryarchaeota	Methanothermus_fervidus_DSM_2088_uid60167	1	1243342	1283	0.286828		0.690217		0.157609		0.228371		0.624573		0.0819113
72	Archaea	Euryarchaeota	Methanotorris_igneus_Kol_5_uid67321	1	1854197	1772	0.445824	0.427795	0.729114	0.492871	0.0962025	0.0656611	0.0682844	0.120874	0.77686	0.72502	0.107438	0.148747
73	Archaea	Euryarchaeota	Aciduliprofundum_boonei_T469_uid43333	1	1486778	1543	0.362281	0.0677602	0.286225	0.137775	0.0357782	0.0315633	0.243033	0.0537176	0.794667	0.050387	0.312	0.0413723
74	Archaea	Euryarchaeota	Archaeoglobus_fulgidus_DSM_4304_uid57717	1	2178400	2414	0.348799		0.245843		0.043943		0.259735		0.679426		0.183413
75	Archaea	Euryarchaeota	archaeon_Mx1201_uid196597	1	1666795	1651	0.412477		0.26138		0.0323054		0.168383		0.76259		0.226619
76	Archaea	Euryarchaeota	Ferroglobus_placidus_DSM_10642_uid40863	1	2196266	2480	0.33871		0.275		0.0571429		0.285484		0.728814		0.201977
77	Archaea	Euryarchaeota	Ferroplasma_acidarmanus_fer1_uid54095	1	1935211	1949	0.45921		0.116201		0.0122905		0.152899		0.684564		0.0973154
78	Archaea	Euryarchaeota	Picrophilus_torridus_DSM_9790_uid58041	1	1545895	1537	0.409239		0.0842607		0.0111288		0.19974		0.648208		0.153094
79	Archaea	Euryarchaeota	Pyrococcus_abyssi_GE5_uid62903	2	1768562	1779	0.370995		0.65303		0.137879		0.214165		0.902887		0.385827
80	Archaea	Euryarchaeota	Pyrococcus_furiosus_DSM_3638_uid57873	1	1908256	2110	0.363981		0.615885		0.136719		0.212322		0.834821		0.34375
81	Archaea	Euryarchaeota	Salinarchaeum_laminariae_Harcht_Bsk1_uid207001	1	3255260	3013	0.518088		0.204356		0.0192184		0.0989047		0.748322		0.268456
82	Archaea	Euryarchaeota	Thermococcus_kodakarensis_KOD1_uid58225	1	2088737	2305	0.337961		0.772786		0.130937		0.203471		0.940299		0.390192
83	Archaea	Euryarchaeota	Thermoplasma_acidophilum_DSM_1728_uid61573	1	1564906	1483	0.45381		0.135215		0.013373		0.157114		0.613734		0.0987124
84	Archaea	Euryarchaeota	Thermoplasma_volcanium_GSS1_uid57751	1	1584804	1500	0.472667		0.173484		0.00987306		0.156667		0.617021		0.0851064
85	Archaea	Euryarchaeota	Thermoplasmatales_archaeon_BRNA1_uid195930	1	1461105	1523	0.35719	0.400416	0.316176	0.31845	0.03125	0.0516798	0.205515	0.196726	0.750799	0.746627	0.249201	0.230436
86	Archaea	Korarchaeota	Candidatus_Korarchaeum_cryptofilum_OPF8_uid58601	1	1590757	1603	0.416719	0.0564912	0.508982	0.211524	0.0733533	0.0476718	0.195883	0.0481493	0.872611	0.0981038	0.232484	0.102345
87	Archaea	Nanoarchaeota	Nanoarchaeum_equitans_Kin4_M_uid58009	1	490885	540	0.468519		0.0118577		0.00395257		0.272222		0.0340136		0
88	Archaea	Thaumarchaeota	Candidatus_Caldiarchaeum_subterraneum_uid227223	1	1680938	1730	0.423121		0.245902		0.0191257		0.186127		0.649068		0.170807
89	Archaea	Thaumarchaeota	Candidatus_Nitrosopumilus_koreensis_AR1_uid176129	1	1639964	1889	0.462679		0.0640732		0.00457666		0.115934		0.479452		0.0958904
90	Archaea	Thaumarchaeota	Candidatus_Nitrososphaera_gargensis_Ga9_2_uid176707	1	2833868	3560	0.522753		0.102096		0.0107469		0.0856742		0.406557		0.101639
91	Archaea	Thaumarchaeota	Cenarchaeum_symbiosum_A_uid61411	1	2045086	2014	0.393247		0.203283		0.020202		0.122642		0.558704		0.0890688
92	Bacteria	Actinobacteria	Acidimicrobidae_bacterium_YM16_304_uid193703	1	4830181	4290	0.400466		0.254366		0.0267753		0.162471		0.484935		0.061693
93	Bacteria	Actinobacteria	Acidimicrobium_ferrooxidans_DSM_10331_uid59215	1	2158157	1963	0.332145		0.592025		0.268405		0.284259		0.736559		0.207885
94	Bacteria	Actinobacteria	Acidothermus_cellulolyticus_11B_uid58501	1	2443540	2157	0.382939		0.576271		0.186441		0.184516		0.658291		0.18593
95	Bacteria	Actinobacteria	Actinoplanes_friuliensis_DSM_7358_uid226110	1	9376071	8565	0.442032		0.447438		0.103011		0.186573		0.569462		0.0988736
96	Bacteria	Actinobacteria	Actinosynnema_mirum_DSM_43827_uid58951	1	8248144	6916	0.476142		0.587003		0.158822		0.184644		0.718089		0.198904
97	Bacteria	Actinobacteria	Adlercreutzia_equolifaciens_DSM_19450_uid223286	1	2862526	2281	0.436212		0.58593		0.19397		0.103463		0.805085		0.317797
98	Bacteria	Actinobacteria	Amycolatopsis_mediterranei_S699_uid158689	1	10236779	9563	0.447977		0.490896		0.123249		0.187807		0.594098		0.128062
99	Bacteria	Actinobacteria	Amycolicicoccus_subflavus_DQS3_9A1_uid67253	3	4863490	4703	0.39932		0.452077		0.0953142		0.168403		0.611111		0.128788
100	Bacteria	Actinobacteria	Arcanobacterium_haemolyticum_DSM_20595_uid49489	1	1986154	1731	0.391681		0.458702		0.0958702		0.192952		0.523952		0.122754
101	Bacteria	Actinobacteria	Arthrobacter_chlorophenolicus_A6_uid58969	3	4980870	4590	0.391721		0.433815		0.0717464		0.166449		0.552356		0.0929319
102	Bacteria	Actinobacteria	Atopobium_parvulum_DSM_20469_uid59195	1	1543805	1353	0.334072		0.668142		0.150442		0.128603		0.689655		0.201149
103	Bacteria	Actinobacteria	Beutenbergia_cavernae_DSM_12333_uid59047	1	4669183	4197	0.383369		0.521442		0.126787		0.227305		0.719078		0.198113
104	Bacteria	Actinobacteria	Bifidobacterium_longum_infantis_ATCC_15697_uid159865	1	2828958	2552	0.429859		0.46217		0.110301		0.123433		0.701587		0.215873
105	Bacteria	Actinobacteria	Blastococcus_saxobsidens_DD2_uid89391	1	4875340	4787	0.397744		0.506303		0.127626		0.206183		0.58156		0.116515
106	Bacteria	Actinobacteria	Brachybacterium_faecium_DSM_4810_uid58649	1	3614992	3067	0.414411		0.512195		0.118017		0.188458		0.749135		0.228374
107	Bacteria	Actinobacteria	Catenulispora_acidiphila_DSM_44928_uid59077	1	10467782	8911	0.458871		0.519687		0.108584		0.154528		0.63907		0.142338
108	Bacteria	Actinobacteria	Cellulomonas_fimi_ATCC_484_uid66779	1	4266344	3761	0.404148		0.565789		0.157895		0.215102		0.639061		0.191595
109	Bacteria	Actinobacteria	Clavibacter_michiganensis_sepedonicus_uid61577	3	3403786	3115	0.412199		0.423676		0.0942368		0.186196		0.543103		0.105172
110	Bacteria	Actinobacteria	Conexibacter_woesei_DSM_14684_uid43467	1	6359369	5913	0.350076		0.359903		0.0695652		0.245899		0.621045		0.123109
111	Bacteria	Actinobacteria	Coriobacterium_glomerans_PW2_uid65787	1	2115681	1768	0.358597		0.711356		0.173502		0.13914		0.682927		0.195122
112	Bacteria	Actinobacteria	Corynebacterium_glutamicum_ATCC_13032_uid61611	1	3282708	3052	0.431848		0.370258		0.0515933		0.109764		0.510448		0.0865672
113	Bacteria	Actinobacteria	Cryptobacterium_curtum_DSM_15641_uid59041	1	1617804	1357	0.37804		0.534113		0.1423		0.12675		0.69186		0.209302
114	Bacteria	Actinobacteria	Eggerthella_lenta_DSM_2243_uid59079	1	3632260	3070	0.409772		0.63434		0.218601		0.144625		0.804054		0.317568
115	Bacteria	Actinobacteria	Frankia_EAN1pec_uid58367	1	8982042	7191	0.533027		0.561962		0.12575		0.145181		0.586207		0.117816
116	Bacteria	Actinobacteria	Frankia_symbiont_of_Datisca_glomerata_uid46257	3	5340989	4214	0.563835		0.556397		0.138047		0.15401		0.599384		0.117103
117	Bacteria	Actinobacteria	Gardnerella_vaginalis_ATCC_14019_uid55487	1	1667350	1364	0.401026		0.409506		0.0859232		0.103372		0.41844		0.0921986
118	Bacteria	Actinobacteria	Geodermatophilus_obscurus_DSM_43160_uid43725	1	5322497	4810	0.457796		0.58901		0.181199		0.177963		0.596963		0.158879
119	Bacteria	Actinobacteria	Gordonia_KTR9_uid174812	4	5885710	5151	0.411765		0.45686		0.0862801		0.171229		0.555556		0.0884354
120	Bacteria	Actinobacteria	Gordonibacter_pamelaeae_7_10_1_b_uid197167	1	3608022	2021	0.618506		0.6104		0.1888		0.0732311		0.75		0.304054
121	Bacteria	Actinobacteria	Intrasporangium_calvum_DSM_43043_uid61729	1	4024382	3563	0.394331		0.49395		0.11032		0.200112		0.660589		0.15568
122	Bacteria	Actinobacteria	Isoptericola_variabilis_225_uid67501	1	3307740	2881	0.410274		0.521151		0.12775		0.198195		0.704028		0.203152
123	Bacteria	Actinobacteria	Jonesia_denitrificans_DSM_20603_uid59053	1	2749646	2511	0.362405		0.481319		0.0714286		0.212664		0.61236		0.132959
124	Bacteria	Actinobacteria	Kineococcus_radiotolerans_SRS30216_uid58067	3	4956672	4680	0.407479		0.522811		0.121133		0.200427		0.652452		0.157783
125	Bacteria	Actinobacteria	Kitasatospora_setae_KM_6054_uid77027	1	8783278	7557	0.479555		0.555464		0.114238		0.13246		0.687313		0.167832
126	Bacteria	Actinobacteria	Kocuria_rhizophila_DC2201_uid59099	1	2697540	2351	0.430455		0.497036		0.0741107		0.159081		0.604278		0.136364
127	Bacteria	Actinobacteria	Kribbella_flavida_DSM_17836_uid43465	1	7579488	6941	0.447774		0.532175		0.1213		0.18081		0.628685		0.135458
128	Bacteria	Actinobacteria	Kytococcus_sedentarius_DSM_20547_uid59071	1	2785024	2554	0.422475		0.488415		0.0982391		0.205951		0.680608		0.211027
129	Bacteria	Actinobacteria	Leifsonia_xyli_cynodontis_DSM_46306_uid221294	1	2686418	2470	0.477328		0.326548		0.0474979		0.176518		0.614679		0.114679
130	Bacteria	Actinobacteria	Microbacterium_testaceum_StLB037_uid62789	1	3982034	3676	0.402339		0.4476		0.0777552		0.22062		0.596794		0.119605
131	Bacteria	Actinobacteria	Micrococcus_luteus_NCTC_2665_uid59033	1	2501097	2236	0.407424		0.496158		0.0987925		0.177549		0.667506		0.216625
132	Bacteria	Actinobacteria	Microlunatus_phosphovorus_NM_1_uid68055	1	5683123	5308	0.420686		0.394536		0.0828482		0.182555		0.545924		0.101135
133	Bacteria	Actinobacteria	Micromonospora_aurantiaca_ATCC_27029_uid42501	1	7025559	6222	0.43298		0.571641		0.168151		0.186596		0.681309		0.186047
134	Bacteria	Actinobacteria	Mobiluncus_curtisii_ATCC_43063_uid49695	1	2146480	1908	0.370545		0.359264		0.0763791		0.143082		0.611722		0.186813
135	Bacteria	Actinobacteria	Modestobacter_marinus_uid167487	1	5575517	5404	0.413397		0.505819		0.126679		0.19245		0.549038		0.113462
136	Bacteria	Actinobacteria	Mycobacterium_leprae_TN_uid57697	1	3268203	1605	0.549533		0.37415		0.0714286		0.140187		0.435556		0.0622222
137	Bacteria	Actinobacteria	Mycobacterium_tuberculosis_H37Rv_uid57777	1	4411532	4003	0.414439		0.417119		0.0892104		0.185611		0.462988		0.064603
138	Bacteria	Actinobacteria	Nakamurella_multipartita_DSM_44233_uid59221	1	6060298	5239	0.439015		0.511304		0.12087		0.176751		0.518359		0.101512
139	Bacteria	Actinobacteria	Nocardia_brasiliensis_ATCC_700358_uid86913	1	9436348	8412	0.473966		0.445699		0.0872837		0.142416		0.575125		0.0884808
140	Bacteria	Actinobacteria	Nocardioides_JS614_uid58149	2	5293685	4909	0.379303		0.453276		0.110097		0.227745		0.637746		0.133274
141	Bacteria	Actinobacteria	Nocardiopsis_alba_ATCC_BAA_2165_uid174334	1	5848211	5505	0.497184		0.507855		0.106686		0.121526		0.70852		0.216741
142	Bacteria	Actinobacteria	Olsenella_uli_DSM_7084_uid51367	1	2051896	1739	0.373778		0.724615		0.258462		0.119609		0.846154		0.384615
143	Bacteria	Actinobacteria	Propionibacterium_acidipropionici_ATCC_4875_uid179069	1	3656170	3335	0.426987		0.448034		0.117275		0.184708		0.717532		0.201299
144	Bacteria	Actinobacteria	Pseudonocardia_dioxanivorans_CB1190_uid65087	6	7440794	6797	0.422686		0.565263		0.170553		0.192438		0.652141		0.159021
145	Bacteria	Actinobacteria	Renibacterium_salmoninarum_ATCC_33209_uid58899	1	3155250	3505	0.362054		0.313633		0.036249		0.157204		0.368421		0.0508167
146	Bacteria	Actinobacteria	Rhodococcus_jostii_RHA1_uid58325	4	9702737	9143	0.441759		0.474375		0.084922		0.16231		0.609838		0.103774
147	Bacteria	Actinobacteria	Rothia_dentocariosa_ATCC_17931_uid49331	1	2506025	2216	0.468412		0.339114		0.0529865		0.0861913		0.586387		0.162304
148	Bacteria	Actinobacteria	Rubrobacter_xylanophilus_DSM_9941_uid58057	1	3225748	3140	0.293312		0.656895		0.279045		0.219108		0.837209		0.344477
149	Bacteria	Actinobacteria	Saccharomonospora_viridis_DSM_43017_uid59055	1	4308349	3828	0.447753		0.509335		0.141774		0.1779		0.712188		0.18649
150	Bacteria	Actinobacteria	Saccharopolyspora_erythraea_NRRL_2338_uid62947	1	8212805	7195	0.510493		0.544242		0.149469		0.127311		0.740175		0.25
151	Bacteria	Actinobacteria	Saccharothrix_espanaensis_DSM_44229_uid184826	1	9360653	8394	0.474744		0.543538		0.126976		0.188706		0.652146		0.142045
152	Bacteria	Actinobacteria	Salinispora_arenicola_CNS_205_uid58659	1	5786361	4917	0.447224		0.555707		0.16553		0.182428		0.648829		0.157191
153	Bacteria	Actinobacteria	Sanguibacter_keddieii_DSM_10542_uid40845	1	4253413	3710	0.40593		0.497344		0.0730412		0.195687		0.639118		0.123967
154	Bacteria	Actinobacteria	Segniliparus_rotundus_DSM_44985_uid49049	1	3157527	3006	0.371257		0.414875		0.0672043		0.222555		0.541106		0.124066
155	Bacteria	Actinobacteria	Slackia_heliotrinireducens_DSM_20476_uid59051	1	3165038	2766	0.413232		0.611549		0.204724		0.0976139		0.722222		0.266667
156	Bacteria	Actinobacteria	Stackebrandtia_nassauensis_DSM_44728_uid46663	1	6841557	6379	0.426242		0.473336		0.0985656		0.158332		0.654455		0.150495
157	Bacteria	Actinobacteria	Streptomyces_bingchenggensis_BCW_1_uid82931	1	11936683	10015	0.487968		0.509924		0.109065		0.137693		0.690355		0.192168
158	Bacteria	Actinobacteria	Streptosporangium_roseum_DSM_43021_uid42521	2	10369518	8975	0.506295		0.552377		0.12544		0.158217		0.66338		0.164789
159	Bacteria	Actinobacteria	Thermobifida_fusca_YX_uid57703	1	3642249	3087	0.490444		0.606341		0.135403		0.126012		0.691517		0.22108
160	Bacteria	Actinobacteria	Thermobispora_bispora_DSM_43833_uid48999	1	4189976	3546	0.501692		0.586284		0.183811		0.167231		0.725126		0.237774
161	Bacteria	Actinobacteria	Thermomonospora_curvata_DSM_43183_uid41885	1	5639016	4889	0.491512		0.607574		0.176446		0.147474		0.71706		0.191401
162	Bacteria	Actinobacteria	Tropheryma_whipplei_Twist_uid57705	1	927303	806	0.344913		0.255396		0.0395683		0.200993		0.216049		0.0185185
163	Bacteria	Actinobacteria	Tsukamurella_paurometabola_DSM_20162_uid48829	2	4479724	4242	0.38826		0.428051		0.0777171		0.211457		0.583055		0.136009
164	Bacteria	Actinobacteria	Verrucosispora_maris_AB_18_032_uid66297	2	6732271	6008	0.446072		0.51903		0.142164		0.172437		0.650579		0.179537
165	Bacteria	Actinobacteria	Xylanimonas_cellulosilytica_DSM_15894_uid41935	2	3831380	3443	0.376997	0.427061	0.483821	0.499675	0.133282	0.12204	0.227128	0.170629	0.693095	0.631443	0.185422	0.163409
166	Bacteria	Aquificae	Aquifex_aeolicus_VF5_uid57765	2	1590791	1525	0.390164	0.0557014	0.25042	0.0938185	0.161345	0.0514345	0.27082	0.0387358	0.510896	0.102919	0.164649	0.0683483
167	Bacteria	Aquificae	Desulfurobacterium_thermolithotrophum_DSM_11699_uid63405	1	1541968	1508	0.244032		0.785326		0.277174		0.29244		0.725624		0.138322
168	Bacteria	Aquificae	Hydrogenobacter_thermophilus_TK_6_uid45927	1	1743135	1892	0.269556		0.309804		0.219608		0.353594		0.585949		0.216741
169	Bacteria	Aquificae	Hydrogenobaculum_Y04AAS1_uid58857	1	1559514	1629	0.193984		0.325949		0.246835		0.342541		0.367384		0.0752688
170	Bacteria	Aquificae	Persephonella_marina_EX_H1_uid58119	2	1983966	2051	0.264261		0.708487		0.258303		0.213067		0.533181		0.114416
171	Bacteria	Aquificae	Sulfurihydrogenibium_azorense_Az_Fu1_uid58121	1	1640877	1723	0.204295		0.698864		0.278409		0.278003		0.521921		0.104384
172	Bacteria	Aquificae	Thermocrinis_albus_DSM_14484_uid46231	1	1500577	1593	0.262398		0.301435		0.217703		0.382925		0.598361		0.214754
173	Bacteria	Aquificae	Thermovibrio_ammonificans_HB_1_uid62095	2	1759526	1813	0.238831	0.25844	0.877598	0.532235	0.376443	0.254478	0.342526	0.30949	0.835749	0.584883	0.2657	0.16178
174	Bacteria	Armatimonadetes	Chthonomonas_calidirosea_T49_uid208678	1	3437861	2808	0.381054	0.0561279	0.654206	0.241578	0.172897	0.0583936	0.11396	0.0519575	0.65	0.133389	0.153125	0.0614479
175	Bacteria	Bacteroidetes/Chlorobi:group	Aequorivita_sublithincola_DSM_14238_uid168181	1	3520671	3139	0.359032		0.00621118		0		0.101625		0.0188088		0.0031348
176	Bacteria	Bacteroidetes/Chlorobi:group	Alistipes_finegoldii_DSM_17242_uid168180	1	3734239	3110	0.355305		0.041629		0.00361991		0.109968		0.0994152		0.0380117
177	Bacteria	Bacteroidetes/Chlorobi:group	Bacteroides_thetaiotaomicron_VPI_5482_uid62913	2	6293399	4816	0.363995		0.0530519		0.00627496		0.0714286		0.139535		0.0697674
178	Bacteria	Bacteroidetes/Chlorobi:group	Belliella_baltica_DSM_15883_uid168182	1	4196595	3676	0.414037		0.0144547		0.00131406		0.118879		0.0594966		0.0183066
179	Bacteria	Bacteroidetes/Chlorobi:group	Blattabacterium__Blattella_germanica__Bge_uid41533	2	640935	590	0.332203		0.0102041		0		0.144068		0		0
180	Bacteria	Bacteroidetes/Chlorobi:group	Candidatus_Amoebophilus_asiaticus_5a2_uid58963	1	1884364	1334	0.58096		0.0658065		0.0116129		0.0494753		0.121212		0.030303
181	Bacteria	Bacteroidetes/Chlorobi:group	Candidatus_Azobacteroides_pseudotrichonymphae_genomovar__CFP2_uid59163	5	1224919	852	0.530516		0.0376106		0.00663717		0.0833333		0.0422535		0
182	Bacteria	Bacteroidetes/Chlorobi:group	Candidatus_Sulcia_muelleri_CARI_uid52535	1	276511	246	0.300813		0		0		0.162602		0		0
183	Bacteria	Bacteroidetes/Chlorobi:group	Candidatus_Uzinura_diaspidicola_ASNER_uid186740	1	263431	227	0.334802		0.0263158		0		0.189427		0.0465116		0
184	Bacteria	Bacteroidetes/Chlorobi:group	Capnocytophaga_canimorsus_Cc5_uid70727	1	2571406	2400	0.3625		0.0264368		0.00229885		0.0720833		0.0462428		0.0115607
185	Bacteria	Bacteroidetes/Chlorobi:group	Cardinium_endosymbiont_cEper1_of_Encarsia_pergandiella_uid175524	2	944930	895	0.437989		0.0127551		0		0.0614525		0.0727273		0
186	Bacteria	Bacteroidetes/Chlorobi:group	Cellulophaga_algicola_DSM_14237_uid62159	1	4888353	4162	0.375781		0.00767263		0.000639386		0.0857761		0.0532213		0.0112045
187	Bacteria	Bacteroidetes/Chlorobi:group	Chitinophaga_pinensis_DSM_2588_uid59113	1	9127347	7192	0.429227		0.03207		0.00291545		0.0621524		0.0738255		0.0178971
188	Bacteria	Bacteroidetes/Chlorobi:group	Chlorobaculum_parvum_NCIB_8327_uid59185	1	2289249	2043	0.393049		0.179328		0.0311333		0.106706		0.509174		0.16055
189	Bacteria	Bacteroidetes/Chlorobi:group	Chlorobium_tepidum_TLS_uid57897	1	2154946	2242	0.396521		0.163105		0.0168729		0.119536		0.380597		0.119403
190	Bacteria	Bacteroidetes/Chlorobi:group	Chloroherpeton_thalassium_ATCC_35110_uid59187	1	3293456	2710	0.435055		0.132316		0.0245971		0.0634686		0.244186		0.0697674
191	Bacteria	Bacteroidetes/Chlorobi:group	Croceibacter_atlanticus_HTCC2559_uid49661	1	2952962	2701	0.334691		0.0110619		0.00110619		0.128101		0.0317919		0.00289017
192	Bacteria	Bacteroidetes/Chlorobi:group	Cyclobacterium_marinum_DSM_745_uid71485	1	6221273	4997	0.427256		0.018267		0.0028103		0.109065		0.0733945		0.0220183
193	Bacteria	Bacteroidetes/Chlorobi:group	Cytophaga_hutchinsonii_ATCC_33406_uid57651	1	4433218	3778	0.380889		0.0312717		0.00347464		0.106406		0.0522388		0.0124378
194	Bacteria	Bacteroidetes/Chlorobi:group	Dyadobacter_fermentans_DSM_18053_uid59049	1	6967790	5719	0.396223		0.0383936		0.00264784		0.0785102		0.0668151		0.0111359
195	Bacteria	Bacteroidetes/Chlorobi:group	Echinicola_vietnamensis_DSM_17526_uid184076	1	5608040	4544	0.428257		0.0354573		0.004111		0.0941901		0.0957944		0.0303738
196	Bacteria	Bacteroidetes/Chlorobi:group	Emticicia_oligotrophica_DSM_17448_uid177079	6	5220361	4266	0.411627		0.0176538		0.0022779		0.0553211		0.029661		0.00423729
197	Bacteria	Bacteroidetes/Chlorobi:group	Fibrella_aestuarina_uid178352	2	6937263	5624	0.408073		0.0222222		0.00087146		0.0741465		0.0239808		0
198	Bacteria	Bacteroidetes/Chlorobi:group	Flavobacterium_johnsoniae_UW101_uid58493	1	6096872	5017	0.39406		0.00708144		0		0.0715567		0.0417827		0.00278552
199	Bacteria	Bacteroidetes/Chlorobi:group	Flexibacter_litoralis_DSM_6794_uid168257	1	4919337	3878	0.53739		0.00815739		0.000959693		0.0283651		0.0545455		0.00909091
200	Bacteria	Bacteroidetes/Chlorobi:group	Fluviicola_taffensis_DSM_16823_uid65271	1	4633577	4033	0.348128		0.00783476		0		0.134887		0.0238971		0
201	Bacteria	Bacteroidetes/Chlorobi:group	Gramella_forsetii_KT0803_uid58881	1	3798465	3581	0.349065		0.0184		0.0032		0.116169		0.0721154		0.00961538
202	Bacteria	Bacteroidetes/Chlorobi:group	Haliscomenobacter_hydrossis_DSM_1100_uid66777	4	8771651	6752	0.443868		0.0253587		0.000333667		0.068128		0.0717391		0.00434783
203	Bacteria	Bacteroidetes/Chlorobi:group	Ignavibacterium_album_JCM_16511_uid162097	1	3658997	3193	0.268713		0.298368		0.039627		0.161604		0.284884		0.0329457
204	Bacteria	Bacteroidetes/Chlorobi:group	Krokinobacter_4H_3_7_5_uid66593	1	3389993	2977	0.352032		0.00763359		0		0.111858		0.0570571		0.003003
205	Bacteria	Bacteroidetes/Chlorobi:group	Lacinutrix_5H_3_7_4_uid68067	1	3296168	2967	0.317829		0.00424178		0		0.0913381		0.0258303		0
206	Bacteria	Bacteroidetes/Chlorobi:group	Leadbetterella_byssophila_DSM_17132_uid60161	1	4059653	3462	0.370595		0.0358535		0.000779423		0.212016		0.0626703		0.00817439
207	Bacteria	Bacteroidetes/Chlorobi:group	Marivirga_tractuosa_DSM_4126_uid60837	2	4516490	3756	0.40229		0.0165453		0.00132363		0.134984		0.061144		0.0118343
208	Bacteria	Bacteroidetes/Chlorobi:group	Melioribacter_roseus_P3M_uid170941	1	3300414	2840	0.252817		0.380223		0.0501393		0.173592		0.310345		0.0547667
209	Bacteria	Bacteroidetes/Chlorobi:group	Muricauda_ruestringensis_DSM_13258_uid72479	1	3842422	3431	0.370737		0.0188679		0.000786164		0.10784		0.0486486		0
210	Bacteria	Bacteroidetes/Chlorobi:group	Niastella_koreensis_GR20_10_uid83125	1	9033684	7174	0.447449		0.0364486		0.00404984		0.0565933		0.0591133		0.0147783
211	Bacteria	Bacteroidetes/Chlorobi:group	Odoribacter_splanchnicus_DSM_20712_uid63397	1	4392288	3496	0.357265		0.0464371		0.00480384		0.0786613		0.141818		0.0581818
212	Bacteria	Bacteroidetes/Chlorobi:group	Ornithobacterium_rhinotracheale_DSM_15997_uid168256	1	2399175	2266	0.311121		0.00992908		0.00141844		0.123566		0.0464286		0.00357143
213	Bacteria	Bacteroidetes/Chlorobi:group	Owenweeksia_hongkongensis_DSM_17368_uid82951	1	4000057	3483	0.342808		0.0175879		0		0.137238		0.0648536		0.0041841
214	Bacteria	Bacteroidetes/Chlorobi:group	Paludibacter_propionicigenes_WB4_uid60725	1	3685504	3020	0.36755		0.0144144		0.0027027		0.0536424		0.0925926		0.0246914
215	Bacteria	Bacteroidetes/Chlorobi:group	Parabacteroides_distasonis_ATCC_8503_uid58301	1	4811379	3845	0.350325		0.0423163		0.00890869		0.0944083		0.143251		0.0550964
216	Bacteria	Bacteroidetes/Chlorobi:group	Pedobacter_heparinus_DSM_2366_uid59111	1	5167383	4252	0.324788		0.0441709		0.00506879		0.102305		0.0988506		0.0206897
217	Bacteria	Bacteroidetes/Chlorobi:group	Pelodictyon_phaeoclathratiforme_BU_1_uid58173	1	3018238	2707	0.381973		0.220503		0.0348162		0.130772		0.40678		0.0988701
218	Bacteria	Bacteroidetes/Chlorobi:group	Persicivirga_dokdonensis_DSW_6_uid186842	1	3914632	3613	0.373374		0.0133432		0		0.122336		0.0384615		0.00226244
219	Bacteria	Bacteroidetes/Chlorobi:group	Polaribacter_MED152_uid54207	1	2961474	2635	0.314231		0.00845411		0.00120773		0.104364		0.0254545		0.00363636
220	Bacteria	Bacteroidetes/Chlorobi:group	Porphyromonas_gingivalis_TDC60_uid67407	1	2339898	2210	0.364253		0.0832298		0.00372671		0.115837		0.121094		0.046875
221	Bacteria	Bacteroidetes/Chlorobi:group	Prevotella_ruminicola_23_uid47507	1	3619559	2763	0.348896		0.060166		0.0124481		0.131741		0.126374		0.0467033
222	Bacteria	Bacteroidetes/Chlorobi:group	Prosthecochloris_aestuarii_DSM_271_uid58151	2	2579695	2327	0.379888		0.209276		0.0429864		0.103997		0.421488		0.136364
223	Bacteria	Bacteroidetes/Chlorobi:group	Psychroflexus_torquis_ATCC_700755_uid54205	1	4321832	3526	0.440726		0.0250965		0		0.112025		0.0278481		0
224	Bacteria	Bacteroidetes/Chlorobi:group	Rhodothermus_marinus_DSM_4252_uid41729	2	3386737	2863	0.338805		0.184536		0.0360825		0.123647		0.225989		0.0367232
225	Bacteria	Bacteroidetes/Chlorobi:group	Riemerella_anatipestifer_RA_CH_1_uid175469	1	2309519	2185	0.309382		0.0118343		0.00147929		0.0828375		0.0110497		0
226	Bacteria	Bacteroidetes/Chlorobi:group	Robiginitalea_biformata_HTCC2501_uid58285	1	3530383	3203	0.350297		0.0392157		0		0.11739		0.0691489		0.0132979
227	Bacteria	Bacteroidetes/Chlorobi:group	Runella_slithyformis_DSM_19594_uid68317	6	6919729	5773	0.420752		0.0226431		0.0049403		0.0758704		0.0844749		0.0365297
228	Bacteria	Bacteroidetes/Chlorobi:group	Salinibacter_ruber_M8_uid47323	5	3832918	3251	0.446324		0.119228		0.015162		0.0470624		0.267974		0.0457516
229	Bacteria	Bacteroidetes/Chlorobi:group	Saprospira_grandis_Lewin_uid89375	2	4400185	4251	0.479652		0.0392349		0.000980873		0.0701012		0.057047		0.00671141
230	Bacteria	Bacteroidetes/Chlorobi:group	Solitalea_canadensis_DSM_3403_uid81783	1	5202069	4309	0.397772		0.0268378		0.00525088		0.0589464		0.125984		0.0354331
231	Bacteria	Bacteroidetes/Chlorobi:group	Sphingobacterium_21_uid64755	1	6226409	5165	0.418587		0.0425532		0.00601295		0.0669894		0.118497		0.0462428
232	Bacteria	Bacteroidetes/Chlorobi:group	Spirosoma_linguale_DSM_74_uid43413	9	8491258	6938	0.427933		0.0293028		0.00202088		0.0687518		0.0712788		0.0146751
233	Bacteria	Bacteroidetes/Chlorobi:group	Tannerella_forsythia_ATCC_43037_uid83157	1	3405521	2993	0.370531		0.0676285		0.0117223		0.114267		0.116959		0.0292398
234	Bacteria	Bacteroidetes/Chlorobi:group	Weeksella_virosa_DSM_16922_uid63627	1	2272954	2049	0.362616		0.00942127		0		0.140068		0.010453		0
235	Bacteria	Bacteroidetes/Chlorobi:group	Zobellia_galactanivorans_uid70621	1	5521712	4730	0.375899		0.0224972		0.00224972		0.0843552		0.0676692		0.00501253
236	Bacteria	Bacteroidetes/Chlorobi:group	Zunongwangia_profunda_SM_A87_uid48073	1	5128187	4652	0.394239	0.38377	0.0305344	0.0530435	0.00218103	0.00697717	0.0872743	0.10105	0.0541872	0.104688	0.00738916	0.0252012
237	Bacteria	Caldiserica	Caldisericum_exile_AZM16c01_uid158173	1	1558103	1579	0.262191	0.0583644	0.502415	0.0729562	0.333333	0.0116371	0.310323	0.0359382	0.626531	0.107995	0.210204	0.0335797
238	Bacteria	Chlamydiae/Verrucomicrobia:group	Akkermansia_muciniphila_ATCC_BAA_835_uid58985	1	2664102	2138	0.425164		0.070407		0.00770077		0.085594		0.169399		0.0655738
239	Bacteria	Chlamydiae/Verrucomicrobia:group	Candidatus_Protochlamydia_amoebophila_UWE25_uid58079	1	2414465	2031	0.530773		0.269944		0.025974		0.103397		0.271429		0.0142857
240	Bacteria	Chlamydiae/Verrucomicrobia:group	Chlamydia_trachomatis_D_UW_3_CX_uid57637	1	1042519	893	0.37514		0.364179		0.0447761		0.148936		0.345865		0.0676692
241	Bacteria	Chlamydiae/Verrucomicrobia:group	Chlamydophila_pneumoniae_CWL029_uid57811	1	1230230	1033	0.410455		0.261792		0.0353774		0.140368		0.351724		0.0482759
242	Bacteria	Chlamydiae/Verrucomicrobia:group	Coraliomargarita_akajimensis_DSM_45221_uid47079	1	3750771	3120	0.392628		0.0612245		0.00653061		0.0916667		0.328671		0.136364
243	Bacteria	Chlamydiae/Verrucomicrobia:group	Methylacidiphilum_infernorum_V4_uid59161	1	2287145	2460	0.386179		0.156842		0.0336842		0.144715		0.227528		0.0421348
244	Bacteria	Chlamydiae/Verrucomicrobia:group	Opitutus_terrae_PB90_1_uid58965	1	5957605	4612	0.449046		0.092226		0.00724288		0.107329		0.250505		0.0808081
245	Bacteria	Chlamydiae/Verrucomicrobia:group	Parachlamydia_acanthamoebae_UV7_uid68335	1	3072383	2782	0.415888		0.370787		0.0406223		0.11862		0.3		0.0333333
246	Bacteria	Chlamydiae/Verrucomicrobia:group	Simkania_negevensis_Z_uid68451	2	2628375	2511	0.401035		0.303873		0.0297915		0.197929		0.342052		0.0442656
247	Bacteria	Chlamydiae/Verrucomicrobia:group	Waddlia_chondrophila_WSU_86_1044_uid49531	2	2131905	1946	0.358684	0.414499	0.345272	0.229655	0.0544413	0.0286141	0.208633	0.134719	0.320197	0.290737	0.0295567	0.0562267
248	Bacteria	Chloroflexi	Anaerolinea_thermophila_UNI_1_uid62245	1	3532378	3164	0.292351	0.0457943	0.467027	0.117245	0.156757	0.0159186	0.169722	0.0400625	0.640596	0.0570037	0.16946	0.0326248
249	Bacteria	Chloroflexi	Caldilinea_aerophila_DSM_14535___NBRC_104270_uid158165	1	5144873	4119	0.390143		0.3771		0.0728065		0.0968682		0.616541		0.130326
250	Bacteria	Chloroflexi	Chloroflexus_aggregans_DSM_9485_uid58621	1	4684931	3731	0.377111		0.5828		0.131485		0.120611		0.595556		0.157778
251	Bacteria	Chloroflexi	Dehalococcoides_ethenogenes_195_uid57763	1	1469720	1578	0.330798		0.509579		0.139847		0.148289		0.611111		0.119658
252	Bacteria	Chloroflexi	Dehalogenimonas_lykanthroporepellens_BL_DC_9_uid48131	1	1686510	1659	0.345992		0.54878		0.202091		0.18686		0.619355		0.158065
253	Bacteria	Chloroflexi	Herpetosiphon_aurantiacus_DSM_785_uid58599	3	6785430	5279	0.430574		0.658601		0.120546		0.108543		0.680628		0.0820244
254	Bacteria	Chloroflexi	Roseiflexus_RS_1_uid58523	1	5801598	4517	0.431038		0.555213		0.148947		0.116449		0.581749		0.121673
255	Bacteria	Chloroflexi	Sphaerobacter_thermophilus_DSM_20745_uid41997	2	3993764	3485	0.449354		0.773946		0.270754		0.125681		0.796804		0.262557
256	Bacteria	Chloroflexi	Thermomicrobium_roseum_DSM_5159_uid59341	2	2920744	2848	0.393961	0.382369	0.656863	0.56999	0.241533	0.164974	0.15309	0.136235	0.729358	0.652411	0.213303	0.157205
257	Bacteria	Chrysiogenetes	Desulfurispirillum_indicum_S5_uid45897	1	2928377	2571	0.313886	0.0488625	0.724907	0.110195	0.171004	0.058665	0.214702	0.0282394	0.646739	0.0666804	0.144928	0.0510383
258	Bacteria	Cyanobacteria	Acaryochloris_marina_MBIC11017_uid58167	10	8361599	8367	0.519302		0.249942		0.0250863		0.0700371		0.421502		0.0836177
259	Bacteria	Cyanobacteria	Anabaena_cylindrica_PCC_7122_uid183339	7	7063285	5836	0.563742		0.246505		0.0243161		0.0712817		0.391827		0.0697115
260	Bacteria	Cyanobacteria	Arthrospira_platensis_NIES_39_uid197171	1	6788435	6623	0.46565		0.296044		0.0282101		0.0869697		0.269097		0.0729167
261	Bacteria	Cyanobacteria	Calothrix_PCC_7507_uid182930	1	7023215	5948	0.578009		0.272542		0.0267597		0.0645595		0.4375		0.106771
262	Bacteria	Cyanobacteria	Chamaesiphon_PCC_6605_uid183005	3	6761765	5943	0.554602		0.18659		0.0145631		0.0563688		0.423881		0.0537313
263	Bacteria	Cyanobacteria	Chroococcidiopsis_thermalis_PCC_7203_uid183002	3	6689401	5751	0.516432		0.269697		0.030303		0.0594679		0.432749		0.0877193
264	Bacteria	Cyanobacteria	Crinalium_epipsammum_PCC_9333_uid183113	9	5620407	4752	0.555345		0.229254		0.0200834		0.0633418		0.458472		0.116279
265	Bacteria	Cyanobacteria	Cyanobacterium_PCC_10605_uid183340	2	4176973	3431	0.593413		0.157171		0.0162083		0.0390557		0.380597		0.134328
266	Bacteria	Cyanobacteria	Cyanobium_gracile_PCC_6307_uid182931	1	3342364	3279	0.421165		0.199131		0.0159305		0.166514		0.369963		0.0641026
267	Bacteria	Cyanobacteria	Cyanothece_PCC_7822_uid52547	7	7841948	6641	0.511821		0.257429		0.0317741		0.0615871		0.403423		0.0855746
268	Bacteria	Cyanobacteria	Cylindrospermum_stagnale_PCC_7417_uid183111	4	7610589	6225	0.565141		0.263502		0.0312678		0.0653815		0.422604		0.0761671
269	Bacteria	Cyanobacteria	Dactylococcopsis_salina_PCC_8305_uid183341	1	3781008	3336	0.528177		0.219069		0.0340522		0.0809353		0.333333		0.0777778
270	Bacteria	Cyanobacteria	Geitlerinema_PCC_7407_uid183007	1	4681111	3815	0.561206		0.351705		0.0471742		0.0542595		0.52657		0.149758
271	Bacteria	Cyanobacteria	Gloeobacter_violaceus_PCC_7421_uid58011	1	4659019	4426	0.452101		0.351324		0.0489755		0.104609		0.423326		0.0734341
272	Bacteria	Cyanobacteria	Gloeocapsa_PCC_7428_uid183112	5	5882710	5010	0.529142		0.259902		0.0290456		0.0610778		0.437908		0.0882353
273	Bacteria	Cyanobacteria	Halothece_PCC_7418_uid183338	1	4179170	3707	0.478284		0.243091		0.0423012		0.074184		0.356364		0.08
274	Bacteria	Cyanobacteria	Leptolyngbya_PCC_7376_uid182928	1	5125950	4227	0.516205		0.229148		0.0192484		0.0449491		0.426316		0.0947368
275	Bacteria	Cyanobacteria	Microcoleus_PCC_7113_uid183114	9	7966510	6437	0.574957		0.301		0.0318833		0.0551499		0.467606		0.129577
276	Bacteria	Cyanobacteria	Microcystis_aeruginosa_NIES_843_uid59101	1	5842795	6308	0.554375		0.193309		0.0263083		0.0505707		0.347962		0.0501567
277	Bacteria	Cyanobacteria	Nostoc_PCC_7120_uid57803	7	7211789	6121	0.564287		0.229589		0.0240301		0.0570168		0.418338		0.0916905
278	Bacteria	Cyanobacteria	Nostoc_punctiforme_PCC_73102_uid57767	6	9059191	6689	0.600688		0.25784		0.0256346		0.0587532		0.470738		0.0636132
279	Bacteria	Cyanobacteria	Oscillatoria_PCC_7112_uid183110	6	8272254	6356	0.601322		0.255887		0.030089		0.0619887		0.484772		0.0837563
280	Bacteria	Cyanobacteria	Pleurocapsa_PCC_7327_uid183006	1	4986817	4268	0.528116		0.263531		0.0390417		0.0424086		0.414365		0.121547
281	Bacteria	Cyanobacteria	Prochlorococcus_marinus_MIT_9303_uid58305	1	2682675	2962	0.50709		0.163782		0.0113182		0.126604		0.261333		0.04
282	Bacteria	Cyanobacteria	Pseudanabaena_PCC_7367_uid183004	2	4885680	3851	0.663204		0.247847		0.0277995		0.0433654		0.407186		0.0598802
283	Bacteria	Cyanobacteria	Rivularia_PCC_7116_uid182929	3	8728773	6643	0.630589		0.20888		0.0183815		0.0424507		0.397163		0.0567376
284	Bacteria	Cyanobacteria	Stanieria_cyanosphaera_PCC_7437_uid183115	6	5544990	4781	0.553022		0.188729		0.0268533		0.0485254		0.366379		0.12069
285	Bacteria	Cyanobacteria	Synechococcus_PCC_6312_uid182934	2	3720499	3545	0.454443		0.322781		0.0328988		0.0874471		0.448387		0.0645161
286	Bacteria	Cyanobacteria	Synechocystis_PCC_6803_uid57659	5	3947019	3569	0.474923		0.212389		0.0259587		0.0641636		0.270742		0.0786026
287	Bacteria	Cyanobacteria	Thermosynechococcus_elongatus_BP_1_uid57907	1	2593857	2475	0.426667		0.308712		0.0445076		0.103434		0.355469		0.0625
288	Bacteria	Cyanobacteria	Trichodesmium_erythraeum_IMS101_uid57925	1	7750108	4451	0.796226	0.543214	0.169582	0.245352	0.0191874	0.0280384	0.0249382	0.0674644	0.468468	0.403043	0.153153	0.0868156
289	Bacteria	Deferribacteres	Calditerrivibrio_nitroreducens_DSM_19672_uid60821	2	2216552	2100	0.205714	0.0727679	0.696759	0.0496503	0.240741	0.00920078	0.307143	0.0275062	0.578295	0.0613921	0.116279	0.0287121
290	Bacteria	Deferribacteres	Deferribacter_desulfuricans_SSM1_uid46653	2	2542933	2374	0.24642		0.625641		0.230769		0.303286		0.520833		0.0722222
291	Bacteria	Deferribacteres	Denitrovibrio_acetiphilus_DSM_12809_uid46657	1	3222077	2964	0.306005		0.675854		0.126792		0.246289		0.608219		0.0767123
292	Bacteria	Deferribacteres	Flexistipes_sinusarabici_DSM_4947_uid68147	1	2526590	2261	0.35073		0.698613		0.228247		0.253428		0.56719		0.102967
293	Bacteria	Deinococcus-Thermus	Deinococcus_radiodurans_R1_uid57665	4	3284156	3165	0.424961		0.312268		0.0684015		0.167141		0.608696		0.141777
294	Bacteria	Deinococcus-Thermus	Marinithermus_hydrothermalis_DSM_14884_uid65783	1	2269167	2205	0.306576		0.539941		0.289941		0.229478		0.833992		0.448617
295	Bacteria	Deinococcus-Thermus	Meiothermus_silvanus_DSM_9946_uid49485	3	3721669	3505	0.334665		0.492754		0.221654		0.154066		0.801852		0.337037
296	Bacteria	Deinococcus-Thermus	Oceanithermus_profundus_DSM_14977_uid60855	2	2439291	2373	0.306363		0.502063		0.236589		0.227139		0.820037		0.435993
297	Bacteria	Deinococcus-Thermus	Thermus_thermophilus_HB8_uid58223	3	2116056	2169	0.312586		0.435103		0.207965		0.26971		0.798291		0.470085
298	Bacteria	Deinococcus-Thermus	Truepera_radiovictrix_DSM_17093_uid49533	1	3260398	2945	0.405093	0.348374	0.526404	0.468089	0.191115	0.202611	0.174194	0.203621	0.754386	0.769542	0.191033	0.337424
299	Bacteria	Dictyoglomi	Dictyoglomus_thermophilum_H_6_12_uid59439	1	1959987	1911	0.238619	0.0484136	0.64693	0.0771301	0.388158	0.0674742	0.264783	0.0413157	0.65415	0.0760211	0.213439	0.128703
300	Bacteria	Elusimicrobia	Elusimicrobium_minutum_Pei191_uid58949	1	1643562	1529	0.321125		0.464358		0.0631365		0.163506		0.488		0.088
301	Bacteria	Elusimicrobia	uncultured_Termite_group_1_bacterium_phylotype_Rs_D17_uid59059	4	1148570	776	0.448454		0.416667		0.0574713		0.141753		0.445455		0.0272727
302	Bacteria	Fibrobacteres/Acidobacteria:group	Acidobacterium_MP5ACTX9_uid50551	6	5503984	4542	0.451563		0.484642		0.050707		0.120872		0.632058		0.114754
303	Bacteria	Fibrobacteres/Acidobacteria:group	Candidatus_Chloracidobacterium_thermophilum_B_uid73587	2	3695372	3053	0.383557		0.316823		0.0409906		0.107108		0.379205		0.0856269
304	Bacteria	Fibrobacteres/Acidobacteria:group	Candidatus_Koribacter_versatilis_Ellin345_uid58479	1	5650368	4777	0.431652		0.456353		0.0703201		0.123718		0.563452		0.0998308
305	Bacteria	Fibrobacteres/Acidobacteria:group	Candidatus_Solibacter_usitatus_Ellin6076_uid58139	1	9965640	7826	0.431383		0.338566		0.0586493		0.164324		0.51633		0.0777605
306	Bacteria	Fibrobacteres/Acidobacteria:group	Fibrobacter_succinogenes_S85_uid41169	1	3842635	3085	0.362723		0.419124		0.0527256		0.122853		0.60686		0.150396
307	Bacteria	Fibrobacteres/Acidobacteria:group	Granulicella_mallensis_MP5ACTX8_uid49957	1	6237577	4814	0.483382		0.482166		0.0498496		0.106564		0.653021		0.128655
308	Bacteria	Fibrobacteres/Acidobacteria:group	Terriglobus_roseus_DSM_18391_uid168183	1	5227858	4245	0.458657	0.428988	0.453005	0.421526	0.0344119	0.0510934	0.114959	0.122914	0.57582	0.560964	0.0922131	0.107034
309	Bacteria	Firmicutes	Acetobacterium_woodii_DSM_1030_uid88073	1	4044777	3473	0.404261	0.0393091	0.702279	0.0629233	0.19302	0.0107667	0.11431	0.0181267	0.692695	0.085265	0.236776	0.0238868
310	Bacteria	Firmicutes	Acetohalobium_arabaticum_DSM_5501_uid51423	1	2469596	2282	0.275635		0.874404		0.461049		0.0968449		0.855204		0.312217
311	Bacteria	Firmicutes	Acholeplasma_laidlawii_PG_8A_uid58901	1	1496992	1380	0.24058		0.63253		0.129518		0.216667		0.538462		0.107023
312	Bacteria	Firmicutes	Acidaminococcus_intestini_RyC_MR95_uid74445	1	2487765	2401	0.340275		0.529988		0.23011		0.152853		0.705722		0.269755
313	Bacteria	Firmicutes	Aerococcus_urinae_ACS_120_V_Col10a_uid64757	1	2080974	1725	0.416812		0.7121		0.239221		0.0962319		0.746988		0.289157
314	Bacteria	Firmicutes	Alicyclobacillus_acidocaldarius_Tc_4_1_uid158681	1	3124048	3204	0.343009		0.561419		0.22111		0.143883		0.709328		0.295011
315	Bacteria	Firmicutes	Alkaliphilus_metalliredigens_QYMF_uid58171	1	4929566	4625	0.361946		0.80227		0.308244		0.110703		0.839844		0.320312
316	Bacteria	Firmicutes	Ammonifex_degensii_KC4_uid41053	2	2157067	2080	0.267308		0.854317		0.455036		0.200962		0.882775		0.406699
317	Bacteria	Firmicutes	Amphibacillus_xylanus_NBRC_15112_uid176453	1	2569486	2410	0.389627		0.807242		0.280085		0.10332		0.767068		0.208835
318	Bacteria	Firmicutes	Anaerococcus_prevotii_DSM_20548_uid59219	2	1998633	1805	0.269252		0.786008		0.26749		0.269252		0.598765		0.141975
319	Bacteria	Firmicutes	Anoxybacillus_flavithermus_WK1_uid59135	1	2846746	2828	0.308699		0.697595		0.22795		0.174328		0.673428		0.166329
320	Bacteria	Firmicutes	Aster_yellows_witches_broom_phytoplasma_AYWB_uid58297	5	723970	690	0.407246		0.298932		0.024911		0.0797101		0.345455		0.0727273
321	Bacteria	Firmicutes	Bacillus_anthracis_Ames_uid57909	1	5227293	5037	0.463371		0.827335		0.239503		0.0946992		0.767296		0.18239
322	Bacteria	Firmicutes	Bacillus_halodurans_C_125_uid57791	1	4202352	4049	0.406026		0.840633		0.293187		0.124722		0.843564		0.293069
323	Bacteria	Firmicutes	Bacillus_subtilis_168_uid57675	1	4215606	4171	0.360585		0.851729		0.294548		0.123472		0.765049		0.198058
324	Bacteria	Firmicutes	Bacillus_thuringiensis_serovar_kurstaki_HD73_uid189188	8	5908575	6186	0.439864		0.789416		0.240353		0.101196		0.746006		0.164537
325	Bacteria	Firmicutes	Brevibacillus_brevis_NBRC_100599_uid59175	1	6296436	5941	0.370645		0.745232		0.258401		0.113281		0.768202		0.267459
326	Bacteria	Firmicutes	Butyrivibrio_proteoclasticus_B316_uid51489	4	4404886	3811	0.289688		0.681159		0.201993		0.0976122		0.61828		0.19086
327	Bacteria	Firmicutes	Caldicellulosiruptor_saccharolyticus_DSM_8903_uid58289	1	2970275	2682	0.296793		0.772613		0.278894		0.131618		0.76204		0.147309
328	Bacteria	Firmicutes	Candidatus_Arthromitus_SFB_mouse_Japan_uid71379	1	1620005	1491	0.267606		0.759398		0.200501		0.0885312		0.666667		0.265152
329	Bacteria	Firmicutes	Candidatus_Desulforudis_audaxviator_MP104C_uid59067	1	2349476	2157	0.335188		0.777317		0.373444		0.1465		0.860759		0.35443
330	Bacteria	Firmicutes	Candidatus_Phytoplasma_australiense_uid61641	1	879959	684	0.438596		0.38		0.0333333		0.0964912		0.545455		0.227273
331	Bacteria	Firmicutes	Carboxydothermus_hydrogenoformans_Z_2901_uid57821	1	2401520	2600	0.223462		0.678141		0.328744		0.168077		0.82151		0.322654
332	Bacteria	Firmicutes	Carnobacterium_maltaromaticum_LMA28_uid179370	1	3650416	3578	0.389044		0.773707		0.22773		0.109838		0.659033		0.188295
333	Bacteria	Firmicutes	Clostridiales_genomosp__BVAB3_UPII9_5_uid46219	1	1809746	1565	0.335463		0.645714		0.207619		0.12524		0.678571		0.214286
334	Bacteria	Firmicutes	Clostridium_acetobutylicum_ATCC_824_uid57677	2	4132880	3775	0.384636		0.821625		0.267906		0.0823841		0.710611		0.170418
335	Bacteria	Firmicutes	Clostridium_botulinum_A_ATCC_3502_uid61579	2	3903260	3590	0.43454		0.808974		0.314103		0.0760446		0.783883		0.263736
336	Bacteria	Firmicutes	Clostridium_difficile_630_uid57679	2	4298133	3758	0.395423		0.82638		0.323015		0.0907398		0.780059		0.243402
337	Bacteria	Firmicutes	Coprococcus_catus_GD_7_uid197174	1	3522704	2971	0.40929		0.140625		0.00822368		0.113093		0.244048		0.0119048
338	Bacteria	Firmicutes	Coprothermobacter_proteolyticus_DSM_5265_uid59253	1	1424912	1474	0.284261		0.522673		0.312649		0.277476		0.638142		0.232274
339	Bacteria	Firmicutes	Dehalobacter_CF_uid177714	1	3092048	2980	0.388591		0.701209		0.249568		0.106376		0.763407		0.33123
340	Bacteria	Firmicutes	Desulfitobacterium_hafniense_Y51_uid58605	1	5727534	5060	0.405731		0.666342		0.261568		0.113439		0.729965		0.310105
341	Bacteria	Firmicutes	Desulfosporosinus_orientis_DSM_765_uid82939	1	5863081	5234	0.395491		0.825121		0.323671		0.1047		0.801095		0.304745
342	Bacteria	Firmicutes	Desulfotomaculum_gibsoniae_DSM_7213_uid76945	1	4855529	4347	0.427651		0.80043		0.316299		0.118933		0.791103		0.346228
343	Bacteria	Firmicutes	Enterococcus_faecalis_V583_uid57669	4	3359974	3261	0.33732		0.75		0.247273		0.137688		0.706013		0.211581
344	Bacteria	Firmicutes	Erysipelothrix_rhusiopathiae_SY1027_uid206518	1	1752910	1767	0.301075		0.761278		0.253759		0.227504		0.564677		0.159204
345	Bacteria	Firmicutes	Ethanoligenens_harbinense_YUAN_3_uid46255	1	3008576	2701	0.356164		0.780665		0.231809		0.148464		0.763092		0.249377
346	Bacteria	Firmicutes	Eubacterium_limosum_KIST612_uid59777	1	4316707	4546	0.292125		0.652108		0.194277		0.143643		0.710567		0.245023
347	Bacteria	Firmicutes	Exiguobacterium_MH3_uid227425	1	3164195	3202	0.349157		0.825581		0.27907		0.170831		0.780622		0.303473
348	Bacteria	Firmicutes	Faecalibacterium_prausnitzii_L2_6_uid197183	1	3321367	2748	0.462518		0.758458		0.288749		0.11754		0.80805		0.368421
349	Bacteria	Firmicutes	Filifactor_alocis_ATCC_35896_uid46625	1	1931012	1641	0.402803		0.742814		0.310136		0.0981109		0.720497		0.204969
350	Bacteria	Firmicutes	Finegoldia_magna_ATCC_29328_uid58867	2	1986740	1812	0.233444		0.791962		0.271868		0.222958		0.606436		0.0891089
351	Bacteria	Firmicutes	Geobacillus_thermoleovorans_CCB_US3_UF5_uid82949	1	3596620	3877	0.377612		0.715164		0.26776		0.136704		0.783019		0.256604
352	Bacteria	Firmicutes	Halanaerobium_hydrogeniformans_uid60191	1	2613117	2295	0.259259		0.860504		0.376471		0.107625		0.748988		0.283401
353	Bacteria	Firmicutes	Halobacillus_halophilus_DSM_2266_uid162033	3	4170008	4121	0.444795		0.774686		0.315876		0.109682		0.780973		0.276549
354	Bacteria	Firmicutes	Halobacteroides_halobius_DSM_5150_uid184862	1	2649255	2468	0.236224		0.888508		0.454545		0.0935981		0.774892		0.333333
355	Bacteria	Firmicutes	Halothermothrix_orenii_H_168_uid58585	1	2578146	2342	0.310418		0.823934		0.343879		0.122545		0.850174		0.285714
356	Bacteria	Firmicutes	Heliobacterium_modesticaldum_Ice1_uid58279	1	3075407	2996	0.363485		0.601469		0.244261		0.113818		0.777126		0.346041
357	Bacteria	Firmicutes	Kyrpidia_tusciae_DSM_2912_uid48361	1	3384766	3149	0.354081		0.83139		0.377578		0.160368		0.851485		0.348515
358	Bacteria	Firmicutes	Lactobacillus_plantarum_ZJ316_uid188689	4	3299755	3274	0.427306		0.689778		0.218013		0.116066		0.673684		0.223684
359	Bacteria	Firmicutes	Lactococcus_lactis_Il1403_uid57671	1	2365589	2276	0.336555		0.509138		0.103133		0.132689		0.612583		0.129139
360	Bacteria	Firmicutes	Leuconostoc_kimchii_IMSNU_11154_uid48589	6	2101787	2129	0.295914		0.592063		0.0825397		0.17473		0.604839		0.155914
361	Bacteria	Firmicutes	Listeria_innocua_Clip11262_uid61567	2	3093113	3043	0.303976		0.832432		0.265946		0.144923		0.807256		0.281179
362	Bacteria	Firmicutes	Lysinibacillus_sphaericus_C3_41_uid58945	2	4817463	4762	0.455271		0.638376		0.205258		0.113818		0.728782		0.190037
363	Bacteria	Firmicutes	Macrococcus_caseolyticus_JCSC5402_uid59003	9	2219737	2052	0.374756		0.772432		0.217165		0.154483		0.656151		0.132492
364	Bacteria	Firmicutes	Mahella_australiensis_50_1_BON_uid66917	1	3135972	2867	0.236484		0.749263		0.29056		0.164981		0.77167		0.276956
365	Bacteria	Firmicutes	Megamonas_hypermegale_uid197163	1	2209938	2101	0.47168		0.497477		0.141271		0.119467		0.330677		0.0836653
366	Bacteria	Firmicutes	Megasphaera_elsdenii_DSM_20460_uid71135	1	2474718	2219	0.327625		0.78542		0.327373		0.148265		0.729483		0.261398
367	Bacteria	Firmicutes	Melissococcus_plutonius_ATCC_35311_uid66803	2	2068732	1879	0.477382		0.688963		0.192865		0.114423		0.55814		0.12093
368	Bacteria	Firmicutes	Mesoplasma_florum_W37_uid224253	1	825824	733	0.208731		0.666667		0.130719		0.132333		0.57732		0.0515464
369	Bacteria	Firmicutes	Moorella_thermoacetica_ATCC_39073_uid58051	1	2628784	2463	0.312627		0.797403		0.332468		0.154283		0.821053		0.326316
370	Bacteria	Firmicutes	Mycoplasma_genitalium_G37_uid57707	1	580076	475	0.216842		0.038835		0		0.307368		0.0821918		0.0205479
371	Bacteria	Firmicutes	Mycoplasma_pneumoniae_M129_uid57709	1	816394	647	0.321484		0.129808		0.0576923		0.258114		0.137725		0.0598802
372	Bacteria	Firmicutes	Natranaerobius_thermophilus_JW_NM_WN_LF_uid59001	3	3191453	2904	0.350895		0.838077		0.406281		0.0967631		0.818505		0.327402
373	Bacteria	Firmicutes	Oceanobacillus_iheyensis_HTE831_uid57867	1	3630528	3499	0.418119		0.818182		0.274094		0.107173		0.765333		0.242667
374	Bacteria	Firmicutes	Oenococcus_oeni_PSU_1_uid59417	1	1780517	1689	0.383067		0.435858		0.0973725		0.203671		0.514535		0.0959302
375	Bacteria	Firmicutes	Onion_yellows_phytoplasma_OY_M_uid58015	1	853092	749	0.484646		0.280992		0.0247934		0.0747664		0.214286		0.0714286
376	Bacteria	Firmicutes	Oscillibacter_valericigenes_uid73895	2	4470622	4689	0.374707		0.652817		0.217416		0.160162		0.711052		0.312916
377	Bacteria	Firmicutes	Paenibacillus_mucilaginosus_KNP414_uid68311	1	8663821	7811	0.455639		0.699635		0.251475		0.0905134		0.787836		0.338048
378	Bacteria	Firmicutes	Pediococcus_claussenii_ATCC_BAA_344_uid81103	9	1978793	1881	0.374269		0.728693		0.190341		0.121744		0.663755		0.157205
379	Bacteria	Firmicutes	Pelotomaculum_thermopropionicum_SI_uid58877	1	3025375	2917	0.330819		0.736788		0.271503		0.130614		0.800525		0.333333
380	Bacteria	Firmicutes	Roseburia_intestinalis_XB6B4_uid197179	1	4286292	3608	0.371674		0.626398		0.208054		0.126663		0.630197		0.227571
381	Bacteria	Firmicutes	Ruminococcus_albus_7_uid51721	5	4482087	3870	0.370284		0.77739		0.299372		0.133592		0.742747		0.245648
382	Bacteria	Firmicutes	Selenomonas_ruminantium_lactilytica_TAM6421_uid157247	10	3631933	3509	0.276147		0.759546		0.288958		0.14705		0.771318		0.267442
383	Bacteria	Firmicutes	Solibacillus_silvestris_StLB046_uid168516	2	3984229	3821	0.433394		0.831522		0.25		0.109657		0.770883		0.23389
384	Bacteria	Firmicutes	Spiroplasma_chrysopicola_DF_1_uid205053	1	1123322	1009	0.282458		0.670175		0.189474		0.0931615		0.62766		0.138298
385	Bacteria	Firmicutes	Staphylococcus_aureus_N315_uid57837	2	2839469	2613	0.463835		0.827558		0.229373		0.134711		0.78125		0.167614
386	Bacteria	Firmicutes	Strawberry_lethal_yellows_phytoplasma__CPA__NZSb11_uid203392	1	959779	1095	0.390868		0.242991		0.0116822		0.108676		0.268908		0.142857
387	Bacteria	Firmicutes	Streptococcus_pneumoniae_TIGR4_uid57857	1	2160842	2098	0.342231		0.511142		0.13649		0.156816		0.613982		0.167173
388	Bacteria	Firmicutes	Streptococcus_pyogenes_M1_GAS_uid57845	1	1852441	1696	0.349057		0.623311		0.130068		0.168632		0.660839		0.167832
389	Bacteria	Firmicutes	Sulfobacillus_acidophilus_TPY_uid68841	1	3551206	3752	0.332889		0.586869		0.240993		0.178838		0.746647		0.312966
390	Bacteria	Firmicutes	Symbiobacterium_thermophilum_IAM_14863_uid58165	1	3566135	3335	0.362519		0.673284		0.320099		0.112144		0.842246		0.459893
391	Bacteria	Firmicutes	Syntrophobotulus_glycolicus_DSM_8271_uid63343	1	3406739	3251	0.302984		0.806091		0.280203		0.151646		0.79716		0.346856
392	Bacteria	Firmicutes	Syntrophomonas_wolfei_Goettingen_uid58179	1	2936195	2504	0.418131		0.765043		0.34384		0.113818		0.807018		0.298246
393	Bacteria	Firmicutes	Syntrophothermus_lipocalidus_DSM_12680_uid49527	1	2405559	2313	0.297017		0.877729		0.44687		0.154777		0.832402		0.301676
394	Bacteria	Firmicutes	Tepidanaerobacter_acetatoxydans_Re1_uid184827	1	2761252	2644	0.293116		0.787097		0.338065		0.131997		0.756447		0.280802
395	Bacteria	Firmicutes	Tetragenococcus_halophilus_uid74441	1	2562720	2553	0.383079		0.742331		0.249489		0.117901		0.694352		0.23588
396	Bacteria	Firmicutes	Thermacetogenium_phaeum_DSM_12270_uid177811	1	2939057	2822	0.337349		0.789916		0.351891		0.161233		0.813187		0.378022
397	Bacteria	Firmicutes	Thermaerobacter_marianensis_DSM_12885_uid61727	1	2844696	2327	0.433606		0.847374		0.493558		0.124624		0.87931		0.510345
398	Bacteria	Firmicutes	Thermincola_potens_JR_uid48823	1	3157416	2949	0.289929		0.870175		0.375439		0.117667		0.832853		0.308357
399	Bacteria	Firmicutes	Thermoanaerobacter_tengcongensis_MB4_uid57813	1	2689445	2587	0.261693		0.790251		0.313146		0.129494		0.785075		0.223881
400	Bacteria	Firmicutes	Thermoanaerobacterium_thermosaccharolyticum_M0795_uid184821	2	2894276	2713	0.272024		0.827913		0.334688		0.121268		0.787234		0.24924
401	Bacteria	Firmicutes	Thermobacillus_composti_KWC4_uid74021	2	4355525	3857	0.357532		0.832487		0.320522		0.141042		0.803309		0.316176
402	Bacteria	Firmicutes	Thermodesulfobium_narugense_DSM_14796_uid66601	1	1898865	1807	0.248478		0.750557		0.340757		0.241284		0.461009		0.142202
403	Bacteria	Firmicutes	Thermosediminibacter_oceani_DSM_16646_uid51421	1	2280035	2197	0.271279		0.85906		0.42953		0.15066		0.867069		0.335347
404	Bacteria	Firmicutes	Ureaplasma_parvum_serovar_3_ATCC_700970_uid57711	1	751719	614	0.250814		0.363636		0.0194805		0.151466		0.311828		0.0107527
405	Bacteria	Firmicutes	Veillonella_parvula_DSM_2008_uid41927	1	2132142	1844	0.32538		0.798333		0.29		0.135575		0.728		0.256
406	Bacteria	Firmicutes	Weissella_koreensis_KACC_15510_uid68837	2	1441470	1357	0.343405	0.34946	0.725322	0.699959	0.139485	0.252246	0.0972734	0.136812	0.681818	0.693767	0.128788	0.23535
407	Bacteria	Fusobacteria	Fusobacterium_nucleatum_ATCC_25586_uid57885	1	2174500	1983	0.276853	0.0677509	0.595628	0.170943	0.242259	0.105286	0.131619	0.0441582	0.616858	0.161962	0.164751	0.0965857
408	Bacteria	Fusobacteria	Ilyobacter_polytropus_DSM_2926_uid59769	3	3132314	2880	0.343056		0.892713		0.421053		0.108333		0.858974		0.298077
409	Bacteria	Fusobacteria	Leptotrichia_buccalis_C_1013_b_uid59211	1	2465610	2220	0.32973		0.680328		0.213115		0.0693694		0.61039		0.149351
410	Bacteria	Fusobacteria	Sebaldella_termitidis_ATCC_33386_uid41865	3	4486650	4150	0.33253		0.849275		0.347101		0.108675		0.784922		0.274945
411	Bacteria	Fusobacteria	Streptobacillus_moniliformis_DSM_12112_uid41863	2	1673280	1442	0.226075	0.301649	0.690184	0.741626	0.202454	0.285196	0.196255	0.12285	0.628975	0.700024	0.123675	0.20216
412	Bacteria	Gemmatimonadetes	Gemmatimonas_aurantiaca_T_27_uid58813	1	4636964	3933	0.353928	0.0442334	0.261494	0.111476	0.0229885	0.0850587	0.166794	0.0418021	0.533537	0.102442	0.0792683	0.0704923
413	Bacteria	Nitrospirae	Candidatus_Nitrospira_defluvii_uid51175	1	4317083	4260	0.335446		0.46676		0.149755		0.129577		0.51087		0.126812
414	Bacteria	Nitrospirae	Leptospirillum_ferriphilum_ML_04_uid175904	1	2406157	2470	0.319838		0.532911		0.148101		0.212955		0.574144		0.15019
415	Bacteria	Nitrospirae	Thermodesulfovibrio_yellowstonii_DSM_11347_uid59257	1	2003803	2026	0.243337		0.419878		0.279919		0.330207		0.484305		0.177877
416	Bacteria	Planctomycetes	Isosphaera_pallida_ATCC_43644_uid62207	2	5529304	3720	0.576344		0.547108		0.0951493		0.0782258		0.608247		0.120275
417	Bacteria	Planctomycetes	Phycisphaera_mikurensis_NBRC_102666_uid157331	2	3884382	3280	0.467073		0.177546		0.0182768		0.127134		0.551559		0.119904
418	Bacteria	Planctomycetes	Pirellula_staleyi_DSM_6068_uid43209	1	6196199	4717	0.50901		0.371928		0.0337359		0.0720797		0.605882		0.0676471
419	Bacteria	Planctomycetes	Planctomyces_brasiliensis_DSM_5305_uid60583	1	6006602	4750	0.494316		0.397359		0.0366269		0.0774737		0.540761		0.138587
420	Bacteria	Planctomycetes	Rhodopirellula_baltica_SH_1_uid61589	1	7145576	7212	0.388935		0.144742		0.00962567		0.193289		0.261119		0.0351506
421	Bacteria	Planctomycetes	Singulisphaera_acidiphila_DSM_18658_uid81777	4	9755686	7247	0.548365	0.49734	0.594615	0.372216	0.0983895	0.048634	0.0901063	0.106385	0.633997	0.533594	0.162328	0.107315
422	Bacteria	Proteobacteria	Acetobacter_pasteurianus_IFO_3283_01_uid59279	7	3340249	3047	0.406958	0.0600808	0.308065	0.168484	0.0258065	0.035234	0.155891	0.0429214	0.402105	0.126159	0.0631579	0.0430349
423	Bacteria	Proteobacteria	Acidiphilium_multivorum_AIU301_uid63345	9	4214744	3947	0.365847		0.450831		0.0706371		0.230555		0.479121		0.0714286
424	Bacteria	Proteobacteria	Agrobacterium_fabrum_C58_uid57865	4	5674258	5353	0.420885		0.454505		0.0767865		0.131141		0.612536		0.102564
425	Bacteria	Proteobacteria	Agromonas_oligotrophica_S58_uid192186	1	8264165	7226	0.476335		0.489831		0.0688553		0.119983		0.565167		0.088812
426	Bacteria	Proteobacteria	Anaplasma_phagocytophilum_HZ_uid57951	1	1471282	1260	0.603175		0.265789		0.0236842		0.0619048		0.333333		0.025641
427	Bacteria	Proteobacteria	Asticcacaulis_excentricus_CB_48_uid55641	4	4308776	3761	0.420633		0.445638		0.0695322		0.14092		0.5		0.0754717
428	Bacteria	Proteobacteria	Azorhizobium_caulinodans_ORS_571_uid58905	1	5369772	4716	0.395674		0.458735		0.0643087		0.137405		0.62963		0.0910494
429	Bacteria	Proteobacteria	Azospirillum_brasilense_Sp245_uid162161	7	7530241	7308	0.840996		0.38464		0.0580866		0.265736		0.520597		0.0947477
430	Bacteria	Proteobacteria	Bartonella_quintana_Toulouse_uid57635	1	1581384	1142	0.477233		0.341284		0.0165138		0.118214		0.4		0.0296296
431	Bacteria	Proteobacteria	Beijerinckia_indica_ATCC_9039_uid59057	3	4418616	3783	0.514407		0.447071		0.0729702		0.104943		0.491184		0.070529
432	Bacteria	Proteobacteria	Bradyrhizobium_japonicum_USDA_6_uid158851	1	9207384	8817	0.477714		0.465812		0.0693257		0.11217		0.528817		0.0778564
433	Bacteria	Proteobacteria	Brevundimonas_subvibrioides_ATCC_15264_uid42117	1	3445263	3327	0.382928		0.433281		0.0463108		0.183649		0.504092		0.0441899
434	Bacteria	Proteobacteria	Brucella_melitensis_bv__1_16M_uid57735	2	3294931	3175	0.453228		0.360667		0.0444753		0.141417		0.454343		0.0757238
435	Bacteria	Proteobacteria	Caulobacter_crescentus_CB15_uid57891	1	4016947	3733	0.424591		0.367823		0.051735		0.154567		0.454073		0.0485269
436	Bacteria	Proteobacteria	Chelativorans_BNC1_uid58069	4	4935185	4543	0.378604		0.540698		0.0912791		0.169712		0.587549		0.0946822
437	Bacteria	Proteobacteria	Dinoroseobacter_shibae_DFL_12_uid58707	6	4417868	4192	0.370229		0.552835		0.108247		0.189647		0.557233		0.110692
438	Bacteria	Proteobacteria	Ehrlichia_chaffeensis_Arkansas_uid57933	1	1176248	1096	0.593066		0.158462		0.00615385		0.064781		0.309859		0.028169
439	Bacteria	Proteobacteria	Erythrobacter_litoralis_HTCC2594_uid58299	1	3052398	3009	0.363576		0.382084		0.0420475		0.195081		0.468484		0.0800681
440	Bacteria	Proteobacteria	Gluconacetobacter_diazotrophicus_PAl_5_uid61587	3	3999591	3849	0.374643		0.36061		0.0492372		0.174071		0.443284		0.0925373
441	Bacteria	Proteobacteria	Gluconobacter_oxydans_H24_uid179202	2	3816232	3729	0.404934		0.299338		0.0311258		0.183427		0.416667		0.0482456
442	Bacteria	Proteobacteria	Granulibacter_bethesdensis_CGDNIH1_uid58661	1	2708355	2433	0.369092		0.288419		0.032294		0.154953		0.419098		0.0397878
443	Bacteria	Proteobacteria	Hyphomicrobium_MC1_uid68453	1	4757528	4840	0.428512		0.438766		0.0472517		0.140289		0.458027		0.0603829
444	Bacteria	Proteobacteria	Hyphomonas_neptunium_ATCC_15444_uid58433	1	3705021	3504	0.408105		0.471329		0.0811189		0.150685		0.534091		0.0795455
445	Bacteria	Proteobacteria	Jannaschia_CCS1_uid58147	2	4404049	4283	0.371235		0.486792		0.0679245		0.20523		0.515358		0.076223
446	Bacteria	Proteobacteria	Leisingera_methylohalidivorans_DSM_14336_uid232356	3	4650996	4530	0.43532		0.469574		0.0841785		0.15894		0.579167		0.101389
447	Bacteria	Proteobacteria	Magnetococcus_MC_1_uid57833	1	4719581	3716	0.437298		0.518769		0.0572308		0.139128		0.636364		0.160542
448	Bacteria	Proteobacteria	Magnetospirillum_magneticum_AMB_1_uid58527	1	4967148	4552	0.366872		0.506587		0.0772455		0.206503		0.579787		0.0893617
449	Bacteria	Proteobacteria	Maricaulis_maris_MCS10_uid58689	1	3368780	3063	0.392752		0.513716		0.0631754		0.16128		0.603239		0.11336
450	Bacteria	Proteobacteria	Mesorhizobium_loti_MAFF303099_uid57601	3	7596297	7236	0.463516		0.403995		0.0623137		0.14262		0.484496		0.0697674
451	Bacteria	Proteobacteria	Methylobacterium_nodulans_ORS_2060_uid59023	8	8839022	8307	0.478632		0.586268		0.121479		0.139641		0.662069		0.132759
452	Bacteria	Proteobacteria	Methylocella_silvestris_BL2_uid59433	1	4305430	3818	0.454688		0.478687		0.0564516		0.135935		0.458574		0.0520231
453	Bacteria	Proteobacteria	Methylocystis_SC2_uid174072	1	3773444	3666	0.419258		0.405986		0.0533507		0.144572		0.449057		0.0566038
454	Bacteria	Proteobacteria	Micavibrio_aeruginosavorus_ARL_13_uid73585	1	2481983	2431	0.397779		0.306101		0.0206825		0.111477		0.405904		0.0664207
455	Bacteria	Proteobacteria	Neorickettsia_sennetsu_Miyayama_uid57965	1	859006	924	0.429654		0.141058		0.0125945		0.127706		0.254237		0.0423729
456	Bacteria	Proteobacteria	Nitrobacter_hamburgensis_X14_uid58293	4	5011522	4326	0.516875		0.474061		0.0711091		0.131993		0.504378		0.0647986
457	Bacteria	Proteobacteria	Novosphingobium_PP1Y_uid67383	4	5313905	4663	0.416041		0.390722		0.0474227		0.165773		0.470893		0.0595084
458	Bacteria	Proteobacteria	Ochrobactrum_anthropi_ATCC_49188_uid58921	6	5205777	4799	0.423838		0.486234		0.0830875		0.148573		0.584853		0.112202
459	Bacteria	Proteobacteria	Octadecabacter_arcticus_238_uid54699	3	5478249	4683	0.491352		0.442416		0.0495437		0.167628		0.443312		0.0611465
460	Bacteria	Proteobacteria	Oligotropha_carboxidovorans_OM5_uid59155	1	3745629	3719	0.425114		0.401645		0.0518659		0.136596		0.549213		0.0728346
461	Bacteria	Proteobacteria	Orientia_tsutsugamushi_Ikeda_uid58869	1	2008987	1965	0.500254		0.22177		0.0142421		0.13944		0.211679		0
462	Bacteria	Proteobacteria	Paracoccus_denitrificans_PD1222_uid58187	3	5236194	5077	0.349813		0.493243		0.0906532		0.217451		0.603261		0.10779
463	Bacteria	Proteobacteria	Parvibaculum_lavamentivorans_DS_1_uid58739	1	3914745	3636	0.388064		0.524451		0.0815025		0.140814		0.568359		0.0996094
464	Bacteria	Proteobacteria	Parvularcula_bermudensis_HTCC2503_uid51641	1	2902643	2683	0.390608		0.427481		0.0601145		0.191949		0.524272		0.100971
465	Bacteria	Proteobacteria	Pelagibacterium_halotolerans_B2_uid74393	2	3948887	3879	0.379221		0.436438		0.0632223		0.167311		0.570108		0.0801233
466	Bacteria	Proteobacteria	Phaeobacter_gallaeciensis_DSM_26640_uid232357	8	4540155	4359	0.398027		0.519308		0.0743516		0.188575		0.616788		0.0875912
467	Bacteria	Proteobacteria	Phenylobacterium_zucineum_HLK1_uid58959	2	4379231	3851	0.439366		0.494681		0.102837		0.164373		0.545024		0.0726698
468	Bacteria	Proteobacteria	Polymorphum_gilvum_SL003B_26A1_uid65447	2	4718963	4393	0.389256		0.491228		0.106433		0.150011		0.670713		0.163885
469	Bacteria	Proteobacteria	Pseudovibrio_FO_BEG1_uid82373	2	5916782	5465	0.455078		0.383193		0.0522718		0.0986276		0.660482		0.139147
470	Bacteria	Proteobacteria	Rhizobium_leguminosarum_bv__viciae_3841_uid57955	7	7751309	7142	0.438113		0.486417		0.0840524		0.137917		0.57868		0.0923858
471	Bacteria	Proteobacteria	Rhodobacter_sphaeroides_KD131_uid59277	4	4711139	4568	0.390324		0.537858		0.108805		0.211471		0.599379		0.106625
472	Bacteria	Proteobacteria	Rhodomicrobium_vannielii_ATCC_17100_uid43247	1	4014469	3565	0.460309		0.481414		0.0560634		0.141655		0.536634		0.112871
473	Bacteria	Proteobacteria	Rhodopseudomonas_palustris_CGA009_uid62901	2	5467640	4817	0.45547		0.470374		0.0565178		0.12622		0.560855		0.0690789
474	Bacteria	Proteobacteria	Rhodospirillum_centenum_SW_uid58805	1	4355543	4002	0.427536		0.47107		0.0900058		0.125937		0.678571		0.14881
475	Bacteria	Proteobacteria	Rickettsia_conorii_Malish_7_uid57633	1	1268755	1364	0.445748		0.113487		0.00493421		0.13563		0.145946		0.00540541
476	Bacteria	Proteobacteria	Rickettsia_prowazekii_Madrid_E_uid61565	1	1111523	843	0.453144		0.125654		0.0078534		0.120996		0.186275		0.00980392
477	Bacteria	Proteobacteria	Roseobacter_litoralis_Och_149_uid54719	4	4745450	4536	0.380732		0.437174		0.059062		0.195326		0.490971		0.0665914
478	Bacteria	Proteobacteria	Ruegeria_pomeroyi_DSS_3_uid57863	2	4601048	4278	0.374708		0.480973		0.0823456		0.181861		0.606684		0.0874036
479	Bacteria	Proteobacteria	Sinorhizobium_meliloti_1021_uid57603	3	6691694	6202	0.430829		0.531063		0.102171		0.140439		0.61194		0.119403
480	Bacteria	Proteobacteria	Sphingobium_japonicum_UT26S_uid47077	5	4424862	4394	0.376195		0.419843		0.045977		0.19208		0.491706		0.0746445
481	Bacteria	Proteobacteria	Sphingomonas_wittichii_RW1_uid58691	3	5915246	5345	0.378297		0.515826		0.0806133		0.19102		0.513222		0.0714985
482	Bacteria	Proteobacteria	Sphingopyxis_alaskensis_RB2256_uid58351	2	3373713	3195	0.3759		0.426311		0.0499584		0.183725		0.46678		0.0647359
483	Bacteria	Proteobacteria	Starkeya_novella_DSM_506_uid48815	1	4765023	4431	0.392914		0.531878		0.0832855		0.149853		0.634036		0.128012
484	Bacteria	Proteobacteria	Tistrella_mobilis_KA081020_065_uid167486	5	6512983	5783	0.379388		0.557885		0.0998177		0.151651		0.686431		0.158495
485	Bacteria	Proteobacteria	Wolbachia_endosymbiont_of_Culex_quinquefasciatus_Pel_uid61645	1	1482455	1275	0.452549		0.303293		0.0554593		0.127843		0.276074		0.0306748
486	Bacteria	Proteobacteria	Wolbachia_wRi_uid59371	1	1445873	1150	0.474783		0.304029		0.047619		0.127826		0.258503		0.0272109
487	Bacteria	Proteobacteria	Xanthobacter_autotrophicus_Py2_uid58453	2	5625098	5033	0.416253		0.545107		0.0930788		0.159746		0.656716		0.123134
488	Bacteria	Proteobacteria	Zymomonas_mobilis_NCIMB_11163_uid41019	4	2223520	1883	0.445566	0.431493	0.343266	0.421699	0.0250298	0.0612793	0.135953	0.153738	0.445312	0.502173	0.0625	0.0796391
489	Bacteria	Proteobacteria	Achromobacter_xylosoxidans_A8_uid59899	3	7359146	6814	0.349574	0.0709906	0.419395	0.106364	0.034005	0.0270631	0.150279	0.0352749	0.602539	0.120678	0.105469	0.035861
490	Bacteria	Proteobacteria	Acidovorax_avenae_ATCC_19860_uid42497	1	5482170	4737	0.364366		0.329085		0.0307068		0.128562		0.538588		0.0952381
491	Bacteria	Proteobacteria	Advenella_kashmirensis_WT001_uid80859	2	4423879	3911	0.479928		0.318061		0.0202451		0.160573		0.342357		0.022293
492	Bacteria	Proteobacteria	Alicycliphilus_denitrificans_K601_uid66307	2	5070751	4696	0.321976		0.367063		0.0396825		0.17483		0.606577		0.151035
493	Bacteria	Proteobacteria	Aromatoleum_aromaticum_EbN1_uid58231	3	4727255	4566	0.345598		0.467681		0.0614702		0.179807		0.557856		0.109622
494	Bacteria	Proteobacteria	Azoarcus_KH32C_uid193704	2	5818755	5188	0.328643		0.492082		0.0756598		0.157864		0.588523		0.111111
495	Bacteria	Proteobacteria	Bordetella_petrii_uid61631	1	5287950	5025	0.348856		0.401027		0.0399315		0.173731		0.587629		0.0733104
496	Bacteria	Proteobacteria	Burkholderia_xenovorans_LB400_uid57823	3	9731138	8702	0.436566		0.424059		0.0400105		0.124454		0.589104		0.0803324
497	Bacteria	Proteobacteria	Chromobacterium_violaceum_ATCC_12472_uid58001	1	4751080	4403	0.388372		0.38538		0.0374269		0.137406		0.61157		0.138843
498	Bacteria	Proteobacteria	Collimonas_fungivorans_Ter331_uid70793	1	5186898	4426	0.405784		0.277283		0.0167038		0.125395		0.381982		0.0342342
499	Bacteria	Proteobacteria	Comamonadaceae_bacterium_CR_uid223378	1	2991840	2625	0.34819		0.274617		0.02407		0.145524		0.445026		0.0837696
500	Bacteria	Proteobacteria	Comamonas_testosteroni_CNB_2_uid62961	2	5464824	4889	0.431786		0.326386		0.0251066		0.101452		0.568548		0.0967742
501	Bacteria	Proteobacteria	Cupriavidus_necator_N_1_uid68689	4	8480857	7826	0.41656		0.431595		0.0392638		0.105801		0.603865		0.120773
502	Bacteria	Proteobacteria	Dechloromonas_aromatica_RCB_uid58025	1	4501104	4170	0.309353		0.392248		0.0410853		0.21223		0.39209		0.0677966
503	Bacteria	Proteobacteria	Delftia_acidovorans_SPH_1_uid58703	1	6767514	6040	0.37798		0.35392		0.0328515		0.134106		0.579012		0.138272
504	Bacteria	Proteobacteria	Gallionella_capsiferriformans_ES_2_uid51505	1	3162471	2894	0.269523		0.339744		0.0358974		0.216655		0.457735		0.0653907
505	Bacteria	Proteobacteria	Herbaspirillum_seropedicae_SmR1_uid50427	1	5513887	4735	0.407814		0.36406		0.0279648		0.110665		0.519084		0.104962
506	Bacteria	Proteobacteria	Herminiimonas_arsenicoxydans_uid58291	1	3424307	3292	0.372418		0.306688		0.0244698		0.115431		0.442105		0.05
507	Bacteria	Proteobacteria	Janthinobacterium_Marseille_uid58603	1	4110251	3690	0.372087		0.302258		0.0182083		0.130894		0.467909		0.068323
508	Bacteria	Proteobacteria	Laribacter_hongkongensis_HLHK9_uid59265	1	3169329	3220	0.362422		0.304199		0.0188518		0.169255		0.550459		0.12844
509	Bacteria	Proteobacteria	Leptothrix_cholodnii_SP_6_uid58971	1	4909403	4363	0.317671		0.341991		0.0281385		0.143938		0.519108		0.0748408
510	Bacteria	Proteobacteria	Methylibium_petroleiphilum_PM1_uid58085	2	4643639	4449	0.330411		0.362585		0.029932		0.159362		0.489422		0.0634697
511	Bacteria	Proteobacteria	Methylobacillus_flagellatus_KT_uid58049	1	2971517	2752	0.321948		0.348758		0.023702		0.150436		0.487923		0.0676329
512	Bacteria	Proteobacteria	Methylovorus_glucosetrophus_SIP3_4_uid59367	3	3082007	2908	0.311554		0.335541		0.0264901		0.153714		0.474273		0.049217
513	Bacteria	Proteobacteria	Neisseria_meningitidis_MC58_uid57817	1	2272360	1951	0.445925		0.221839		0.0195402		0.084572		0.369697		0.0545455
514	Bacteria	Proteobacteria	Nitrosomonas_Is79A3_uid68745	1	3783444	3370	0.422552		0.386938		0.0498596		0.127893		0.348028		0.0394432
515	Bacteria	Proteobacteria	Nitrosospira_multiformis_ATCC_25196_uid58361	4	3234309	2801	0.430918		0.392709		0.0720795		0.117458		0.337386		0.0425532
516	Bacteria	Proteobacteria	Pandoraea_pnomenusa_3kgm_uid229878	1	5435131	4797	0.44236		0.417531		0.0428841		0.114655		0.589091		0.138182
517	Bacteria	Proteobacteria	Polaromonas_JS666_uid58207	3	5898676	5453	0.398496		0.364013		0.0303728		0.137906		0.510638		0.0824468
518	Bacteria	Proteobacteria	Polynucleobacter_necessarius_asymbioticus_QLW_P1DMWA_1_uid58611	1	2159490	2077	0.334136		0.208934		0.0144092		0.129995		0.32963		0.037037
519	Bacteria	Proteobacteria	Pseudogulbenkiania_NH8B_uid73423	1	4332995	4012	0.381356		0.443791		0.0490196		0.160768		0.572093		0.122481
520	Bacteria	Proteobacteria	Pusillimonas_T7_7_uid66391	2	3924810	3771	0.354018		0.316105		0.0157303		0.143198		0.5		0.0574074
521	Bacteria	Proteobacteria	Ralstonia_solanacearum_GMI1000_uid57593	2	5810922	5103	0.404664		0.412107		0.0498789		0.136586		0.559541		0.0903874
522	Bacteria	Proteobacteria	Ramlibacter_tataouinensis_TTB310_uid68279	1	4070193	3878	0.336772		0.371363		0.0306279		0.175864		0.524927		0.0997067
523	Bacteria	Proteobacteria	Rhodoferax_ferrireducens_T118_uid58353	2	4969784	4417	0.352728		0.301669		0.0154044		0.153951		0.466176		0.0544118
524	Bacteria	Proteobacteria	Rubrivivax_gelatinosus_IL144_uid158163	1	5043253	4691	0.333831		0.314815		0.0306513		0.199531		0.482906		0.0555556
525	Bacteria	Proteobacteria	Shigella_dysenteriae_1617_uid229875	2	4480198	6262	0.388374		0.358141		0.0217928		0.14596		0.381838		0.0557987
526	Bacteria	Proteobacteria	Sulfuricella_denitrificans_skB26_uid170240	2	3217213	3073	0.297104		0.352683		0.0427163		0.179954		0.381555		0.0705244
527	Bacteria	Proteobacteria	Taylorella_equigenitalis_MCE9_uid62103	1	1695860	1555	0.313826		0.264344		0.0245902		0.176849		0.367273		0.0654545
528	Bacteria	Proteobacteria	Thauera_MZ1T_uid58987	2	4574586	3978	0.352187		0.47823		0.0656674		0.167924		0.652695		0.11976
529	Bacteria	Proteobacteria	Thiobacillus_denitrificans_ATCC_25259_uid58189	1	2909809	2827	0.297135		0.382143		0.0511905		0.229572		0.414484		0.0600924
530	Bacteria	Proteobacteria	Thiomonas_3As_uid178369	2	3785534	3591	0.320802		0.322917		0.0303819		0.157338		0.511504		0.0849558
531	Bacteria	Proteobacteria	Variovorax_paradoxus_B4_uid218005	2	7148516	6748	0.336692		0.327905		0.0176056		0.167161		0.449468		0.0673759
532	Bacteria	Proteobacteria	Verminephrobacter_eiseniae_EF01_2_uid58675	2	5597943	4945	0.355511	0.364063	0.313993	0.354952	0.019909	0.0337769	0.170273	0.150904	0.480998	0.491664	0.0665083	0.0810404
533	Bacteria	Proteobacteria	Anaeromyxobacter_dehalogenans_2CP_1_uid58989	1	5029329	4473	0.390789	0.0466998	0.509153	0.0613012	0.120137	0.0149554	0.153365	0.0304317	0.766764	0.0877459	0.196793	0.0316244
534	Bacteria	Proteobacteria	Bacteriovorax_marinus_SJ_uid82341	2	3437906	3231	0.376354		0.356086		0.0345395		0.177654		0.33101		0.0261324
535	Bacteria	Proteobacteria	Bdellovibrio_bacteriovorus_HD100_uid61595	1	3782950	3586	0.383157		0.439592		0.0887918		0.155047		0.52518		0.0773381
536	Bacteria	Proteobacteria	Corallococcus_coralloides_DSM_2259_uid157997	1	10080619	8032	0.415339		0.527878		0.10042		0.129358		0.725698		0.185756
537	Bacteria	Proteobacteria	delta_proteobacterium_BABL1_uid230716	1	1118422	979	0.440245		0.303944		0.0208817		0.0561798		0.127273		0.0181818
538	Bacteria	Proteobacteria	Desulfarculus_baarsii_DSM_2075_uid51371	1	3655731	3277	0.309429		0.67357		0.145957		0.183094		0.696667		0.175
539	Bacteria	Proteobacteria	Desulfatibacillum_alkenivorans_AK_01_uid58913	1	6517073	5252	0.386139		0.612426		0.180473		0.11805		0.66129		0.214516
540	Bacteria	Proteobacteria	Desulfobacca_acetoxidans_DSM_11109_uid65785	1	3282536	2866	0.384857		0.537625		0.145059		0.136427		0.516624		0.122762
541	Bacteria	Proteobacteria	Desulfobacterium_autotrophicum_HRM2_uid59061	2	5657782	4934	0.3788		0.516854		0.11236		0.164775		0.562116		0.131611
542	Bacteria	Proteobacteria	Desulfobacula_toluolica_Tol2_uid175777	1	5197905	4375	0.3632		0.461926		0.100692		0.137143		0.468333		0.13
543	Bacteria	Proteobacteria	Desulfobulbus_propionicus_DSM_2032_uid62265	1	3851869	3283	0.350289		0.555652		0.157391		0.16753		0.605455		0.185455
544	Bacteria	Proteobacteria	Desulfocapsa_sulfexigens_DSM_10523_uid189952	2	4023512	3531	0.345794		0.446355		0.0687961		0.14132		0.442886		0.0881764
545	Bacteria	Proteobacteria	Desulfococcus_oleovorans_Hxd3_uid58777	1	3944167	3265	0.361103		0.53011		0.123834		0.133844		0.588101		0.12357
546	Bacteria	Proteobacteria	Desulfohalobium_retbaense_DSM_5692_uid59183	2	2909567	2526	0.408551		0.640504		0.179264		0.155186		0.647959		0.160714
547	Bacteria	Proteobacteria	Desulfomicrobium_baculatum_DSM_4028_uid59217	1	3942657	3436	0.332654		0.644794		0.151356		0.190047		0.629403		0.143951
548	Bacteria	Proteobacteria	Desulfomonile_tiedjei_DSM_6799_uid168320	2	6527027	5491	0.478237		0.647372		0.168317		0.108177		0.589226		0.127946
549	Bacteria	Proteobacteria	Desulfotalea_psychrophila_LSv54_uid58153	3	3659634	3231	0.402043		0.403387		0.0454196		0.121015		0.409207		0.0818414
550	Bacteria	Proteobacteria	Desulfovibrio_vulgaris_Hildenborough_uid57645	2	3773159	3531	0.407533		0.564976		0.138985		0.14047		0.715726		0.21371
551	Bacteria	Proteobacteria	Geobacter_metallireducens_GS_15_uid57731	2	4011182	3566	0.275098		0.746177		0.252803		0.142457		0.712598		0.175197
552	Bacteria	Proteobacteria	Haliangium_ochraceum_DSM_14365_uid41425	1	9446314	6719	0.460932		0.369067		0.0429448		0.144069		0.67562		0.14876
553	Bacteria	Proteobacteria	Hippea_maritima_DSM_10411_uid65267	1	1694430	1677	0.196184		0.662614		0.346505		0.385808		0.542504		0.0803709
554	Bacteria	Proteobacteria	Lawsonia_intracellularis_N343_uid186598	4	1719192	1368	0.424708		0.41136		0.0585198		0.0979532		0.410448		0.0373134
555	Bacteria	Proteobacteria	Myxococcus_xanthus_DK_1622_uid58003	1	9139763	7294	0.427886		0.417815		0.0682474		0.144777		0.637311		0.14678
556	Bacteria	Proteobacteria	Pelobacter_propionicus_DSM_2379_uid58255	3	4241119	3804	0.347003		0.64697		0.187879		0.171924		0.695719		0.203364
557	Bacteria	Proteobacteria	Sorangium_cellulosum_So0157_2_uid210741	1	14782125	10396	0.583013		0.368091		0.0744102		0.112543		0.664957		0.14188
558	Bacteria	Proteobacteria	Stigmatella_aurantiaca_DW4_3_1_uid158509	1	10260756	8352	0.421097		0.488485		0.0881433		0.120211		0.681275		0.178287
559	Bacteria	Proteobacteria	Syntrophobacter_fumaroxidans_MPOB_uid58177	1	4990251	4064	0.483514		0.61374		0.159796		0.105807		0.590698		0.132558
560	Bacteria	Proteobacteria	Syntrophus_aciditrophicus_SB_uid58539	1	3179300	3134	0.373644	0.389557	0.415884	0.5183	0.134073	0.124857	0.158583	0.148315	0.462777	0.574386	0.132797	0.135027
561	Bacteria	Proteobacteria	Arcobacter_nitrofigilis_DSM_7299_uid49001	1	3192235	3126	0.272553	0.0693153	0.241784	0.113548	0.0129108	0.0683534	0.221049	0.0537255	0.31259	0.139046	0.0217077	0.0531455
562	Bacteria	Proteobacteria	Campylobacter_jejuni_NCTC_11168___ATCC_700819_uid57587	1	1641481	1576	0.252538		0.233668		0.0150754		0.334391		0.26186		0.0246679
563	Bacteria	Proteobacteria	Helicobacter_pylori_26695_uid178201	1	1667892	1593	0.300691		0.308977		0.0146138		0.200251		0.304075		0.031348
564	Bacteria	Proteobacteria	Nautilia_profundicola_AmH_uid59345	1	1676444	1728	0.259259		0.316964		0.03125		0.320602		0.33935		0.0361011
565	Bacteria	Proteobacteria	Nitratifractor_salsuginis_DSM_16511_uid62183	1	2101285	2088	0.286877		0.494157		0.0884808		0.233238		0.605749		0.151951
566	Bacteria	Proteobacteria	Nitratiruptor_SB155_2_uid58861	1	1877931	1843	0.245795		0.443709		0.0507726		0.406403		0.455274		0.0400534
567	Bacteria	Proteobacteria	Sulfuricurvum_kujiense_DSM_16994_uid60789	5	2819357	2798	0.283774		0.380353		0.0377834		0.271623		0.447368		0.0394737
568	Bacteria	Proteobacteria	Sulfurimonas_autotrophica_DSM_16294_uid53043	1	2153198	2158	0.261353		0.251773		0.0124113		0.243281		0.35619		0.0133333
569	Bacteria	Proteobacteria	Sulfurospirillum_barnesii_SES_3_uid168117	1	2510109	2489	0.254721		0.413249		0.0457413		0.286059		0.412921		0.0379213
570	Bacteria	Proteobacteria	Sulfurovum_NBC37_1_uid58863	1	2562277	2437	0.314731		0.312907		0.0312907		0.196553		0.501044		0.091858
571	Bacteria	Proteobacteria	Wolinella_succinogenes_DSM_1740_uid61591	1	2110355	2043	0.267744	0.272731	0.444241	0.349253	0.0676417	0.0370884	0.262359	0.270528	0.578358	0.415889	0.110075	0.0544082
572	Bacteria	Proteobacteria	Acidithiobacillus_ferrooxidans_ATCC_23270_uid57649	1	2982397	3135	0.314195	0.0205854	0.458883	0.0865511	0.0741117	0.023526	0.216268	0.0605649	0.529499	0.10811	0.122419	0.0418054
573	Bacteria	Proteobacteria	Acinetobacter_baumannii_ATCC_17978_uid58731	3	4001457	3366	0.595663		0.146633		0.00448878		0.0386215		0.461538		0.0538462
574	Bacteria	Proteobacteria	Actinobacillus_suis_H91_0380_uid176363	1	2484940	2248	0.349644		0.398219		0.0178117		0.104982		0.491525		0.0677966
575	Bacteria	Proteobacteria	Aeromonas_salmonicida_A449_uid58631	6	5040536	4428	0.442638		0.453061		0.0433673		0.119919		0.60452		0.135593
576	Bacteria	Proteobacteria	Aggregatibacter_actinomycetemcomitans_D7S_1_uid46989	1	2309073	2255	0.377384		0.3302		0.0152761		0.0988914		0.470852		0.044843
577	Bacteria	Proteobacteria	Alcanivorax_borkumensis_SK2_uid58169	1	3120143	2752	0.415698		0.48514		0.0375874		0.153706		0.579196		0.0851064
578	Bacteria	Proteobacteria	Aliivibrio_salmonicida_LFI1238_uid59251	6	4655660	3911	0.460496		0.285952		0.0116602		0.122731		0.391667		0.0270833
579	Bacteria	Proteobacteria	Alkalilimnicola_ehrlichii_MLHE_1_uid58467	1	3275944	2865	0.349389		0.619381		0.116883		0.169634		0.728395		0.246914
580	Bacteria	Proteobacteria	Allochromatium_vinosum_DSM_180_uid46083	3	3669074	3220	0.325776		0.448999		0.0266921		0.168012		0.561922		0.0942699
581	Bacteria	Proteobacteria	Alteromonas_SN2_uid67349	1	4972148	4370	0.432037		0.314619		0.0164195		0.132265		0.458478		0.0570934
582	Bacteria	Proteobacteria	Azotobacter_vinelandii_DJ_uid57597	1	5365318	5047	0.427779		0.450208		0.04956		0.151179		0.643512		0.108781
583	Bacteria	Proteobacteria	Buchnera_aphidicola_APS__Acyrthosiphon_pisum__uid57805	3	655725	574	0.365854		0.180952		0.00952381		0.0714286		0.317073		0
584	Bacteria	Proteobacteria	Cellvibrio_japonicus_Ueda107_uid59139	1	4576573	3745	0.372764		0.366046		0.030086		0.111081		0.507212		0.0913462
585	Bacteria	Proteobacteria	Chromohalobacter_salexigens_DSM_3043_uid62921	1	3696649	3298	0.379927		0.577015		0.0742219		0.138569		0.689278		0.161926
586	Bacteria	Proteobacteria	Citrobacter_koseri_ATCC_BAA_895_uid58143	3	4735357	4910	0.396334		0.38592		0.0292909		0.160285		0.587039		0.0978399
587	Bacteria	Proteobacteria	Colwellia_psychrerythraea_34H_uid57855	1	5373180	4885	0.473286		0.195502		0.00951557		0.0806551		0.42132		0.0380711
588	Bacteria	Proteobacteria	Coxiella_burnetii_Dugway_5J108_111_uid58629	2	2212937	2041	0.4439		0.301325		0.0408389		0.164135		0.331343		0.0328358
589	Bacteria	Proteobacteria	Cronobacter_turicensis_z3032_uid40821	4	4599092	4450	0.415955		0.444625		0.0410589		0.139551		0.634461		0.10789
590	Bacteria	Proteobacteria	Cycloclasticus_zancles_7_ME_uid214092	2	2655425	2584	0.299923		0.299355		0.0206452		0.159056		0.36253		0.0413625
591	Bacteria	Proteobacteria	Dichelobacter_nodosus_VCS1703A_uid57643	1	1389350	1278	0.296557		0.422164		0.0290237		0.207355		0.418868		0.0377358
592	Bacteria	Proteobacteria	Dickeya_dadantii_3937_uid52537	1	4922802	4512	0.452571		0.426053		0.0406464		0.147163		0.584337		0.0963855
593	Bacteria	Proteobacteria	Ectothiorhodospiraceae_bacterium_M19_40_uid199898	1	1739487	1684	0.301069		0.500986		0.0670611		0.241686		0.584767		0.0761671
594	Bacteria	Proteobacteria	Edwardsiella_ictaluri_93_146_uid59403	1	3812301	3732	0.458467		0.431327		0.0403273		0.128349		0.653445		0.121086
595	Bacteria	Proteobacteria	Enterobacter_cloacae_ATCC_13047_uid48363	3	5598796	5516	0.388687		0.472015		0.0405784		0.161349		0.652809		0.122472
596	Bacteria	Proteobacteria	Erwinia_amylovora_ATCC_49946_uid46943	3	3905604	3565	0.432258		0.438027		0.0285529		0.144741		0.55814		0.0794574
597	Bacteria	Proteobacteria	Escherichia_coli_K_12_substr__MG1655_uid57779	1	4641652	4136	0.425774		0.497445		0.044293		0.144342		0.61474		0.118928
598	Bacteria	Proteobacteria	Escherichia_coli_O157_H7_Sakai_uid57781	3	5594477	5276	0.393859		0.475457		0.047642		0.170015		0.627648		0.125975
599	Bacteria	Proteobacteria	Francisella_tularensis_SCHU_S4_uid57589	1	1892775	1555	0.407074		0.203791		0.0157978		0.106752		0.361446		0.0180723
600	Bacteria	Proteobacteria	Gallibacterium_anatis_UMN179_uid66567	2	2694139	2500	0.352		0.4375		0.0375		0.1276		0.545455		0.0595611
601	Bacteria	Proteobacteria	Glaciecola_psychrophila_170_uid193711	1	5413691	5609	0.433054		0.213668		0.00823384		0.113211		0.340157		0.0251969
602	Bacteria	Proteobacteria	Haemophilus_influenzae_Rd_KW20_uid57771	1	1830138	1608	0.385572		0.303226		0.016129		0.121891		0.367347		0.0153061
603	Bacteria	Proteobacteria	Halomonas_elongata_DSM_2581_uid52781	1	4061296	3473	0.385546		0.616878		0.102315		0.158365		0.763636		0.227273
604	Bacteria	Proteobacteria	Halothiobacillus_neapolitanus_c2_uid41317	1	2582886	2357	0.334748		0.442332		0.0392902		0.16207		0.463351		0.052356
605	Bacteria	Proteobacteria	Idiomarina_loihiensis_L2TR_uid58087	1	2839318	2628	0.341324		0.406912		0.0412486		0.174277		0.550218		0.0567686
606	Bacteria	Proteobacteria	Klebsiella_pneumoniae_342_uid59145	3	5920257	5759	0.43063		0.470161		0.0455645		0.149852		0.674392		0.128621
607	Bacteria	Proteobacteria	Legionella_pneumophila_Philadelphia_1_uid193710	2	3507714	3325	0.435188		0.326883		0.0221147		0.154586		0.451362		0.0505837
608	Bacteria	Proteobacteria	Listonella_anguillarum_M3_uid217771	3	4117885	3678	0.433116		0.328311		0.0131827		0.122893		0.526549		0.0486726
609	Bacteria	Proteobacteria	Mannheimia_haemolytica_M42548_uid198769	1	2731870	2800	0.3425		0.379562		0.0177268		0.136071		0.548556		0.0551181
610	Bacteria	Proteobacteria	Marinobacter_adhaerens_HP15_uid162009	3	4651725	4407	0.375766		0.384662		0.0471014		0.136828		0.646766		0.147595
611	Bacteria	Proteobacteria	Marinomonas_MWYL1_uid58715	1	5100344	4439	0.393107		0.383381		0.0217765		0.123451		0.505474		0.060219
612	Bacteria	Proteobacteria	Methylococcus_capsulatus_Bath_uid57607	1	3304561	2955	0.350254		0.410628		0.0628019		0.182403		0.489796		0.12616
613	Bacteria	Proteobacteria	Methylomicrobium_alcaliphilum_uid77119	1	4668296	3975	0.473962		0.300425		0.0270701		0.158239		0.400636		0.0429253
614	Bacteria	Proteobacteria	Methylomonas_methanica_MC09_uid67363	1	5051681	4494	0.35425		0.351131		0.0345477		0.1749		0.405852		0.0407125
615	Bacteria	Proteobacteria	Methylophaga_JAM1_uid162947	1	3137192	3021	0.352201		0.327068		0.0263158		0.180735		0.346154		0.032967
616	Bacteria	Proteobacteria	Moraxella_catarrhalis_BBH18_uid48809	1	1863286	1882	0.434644		0.198044		0.00855746		0.0913921		0.337209		0.0290698
617	Bacteria	Proteobacteria	Morganella_morganii_KT_uid180867	1	3799539	3526	0.417754		0.458248		0.035981		0.13755		0.602062		0.0948454
618	Bacteria	Proteobacteria	Nitrosococcus_halophilus_Nc4_uid46803	2	4145260	3817	0.394551		0.442231		0.0723772		0.14252		0.544118		0.0919118
619	Bacteria	Proteobacteria	Oceanimonas_GK1_uid81627	3	3527244	3220	0.382609		0.465097		0.0487013		0.184161		0.659359		0.111298
620	Bacteria	Proteobacteria	Pantoea_At_9b_uid55845	6	6312783	5770	0.418718		0.50745		0.0480132		0.156153		0.670366		0.116537
621	Bacteria	Proteobacteria	Pasteurella_multocida_Pm70_uid57627	1	2257487	2012	0.360835		0.370523		0.0289256		0.10338		0.475962		0.0673077
622	Bacteria	Proteobacteria	Pectobacterium_SCC3193_uid193707	1	5164411	4704	0.443878		0.452107		0.0272989		0.14307		0.597325		0.123328
623	Bacteria	Proteobacteria	Photobacterium_profundum_SS9_uid62923	3	6403280	5487	0.521597		0.301537		0.0234102		0.093676		0.496109		0.0525292
624	Bacteria	Proteobacteria	Photorhabdus_luminescens_laumondii_TTO1_uid61593	1	5688987	4680	0.441667		0.425254		0.0391872		0.149573		0.575714		0.08
625	Bacteria	Proteobacteria	Proteus_mirabilis_HI4320_uid61599	2	4099895	3661	0.422562		0.39819		0.0284421		0.132204		0.595041		0.088843
626	Bacteria	Proteobacteria	Providencia_stuartii_MRSN_2154_uid162193	1	4402109	4095	0.4442		0.387576		0.0351842		0.12967		0.564972		0.105461
627	Bacteria	Proteobacteria	Pseudoalteromonas_atlantica_T6c_uid58283	1	5187005	4281	0.448026		0.310219		0.0109489		0.105816		0.403974		0.0397351
628	Bacteria	Proteobacteria	Pseudomonas_aeruginosa_PAO1_uid57945	1	6264404	5572	0.392857		0.55048		0.05619		0.144652		0.673697		0.155087
629	Bacteria	Proteobacteria	Pseudoxanthomonas_spadix_BD_a59_uid75113	1	3452554	3146	0.405912		0.312451		0.0234926		0.174189		0.501825		0.0547445
630	Bacteria	Proteobacteria	Psychrobacter_G_uid210641	4	3113999	2614	0.529457		0.227601		0.0050578		0.0455241		0.621849		0.0672269
631	Bacteria	Proteobacteria	Psychromonas_ingrahamii_37_uid58521	1	4559598	3545	0.506629		0.326281		0.0144766		0.104372		0.410811		0.0486486
632	Bacteria	Proteobacteria	Raoultella_ornithinolytica_B6_uid198431	1	5398151	4908	0.439283		0.488868		0.0357143		0.145884		0.682961		0.122905
633	Bacteria	Proteobacteria	Rhodanobacter_2APBS1_uid74431	1	4225490	3824	0.362709		0.466474		0.0418169		0.167103		0.558685		0.0719875
634	Bacteria	Proteobacteria	Saccharophagus_degradans_2_40_uid57921	1	5057531	4007	0.439231		0.35625		0.0289773		0.0773646		0.512903		0.0806452
635	Bacteria	Proteobacteria	Salmonella_enterica_serovar_Typhimurium_LT2_uid57799	2	4951371	4553	0.41577		0.489699		0.0449023		0.157698		0.630919		0.116992
636	Bacteria	Proteobacteria	Serratia_plymuthica_S13_uid210642	1	5467306	4991	0.460429		0.474761		0.0369887		0.128231		0.6375		0.0890625
637	Bacteria	Proteobacteria	Shewanella_oneidensis_MR_1_uid57949	2	5131424	4208	0.471721		0.390428		0.0287154		0.10385		0.562929		0.0503432
638	Bacteria	Proteobacteria	Sodalis_glossinidius__morsitans__uid58553	4	4292502	2516	0.580684		0.436687		0.0472279		0.120032		0.516556		0.0993377
639	Bacteria	Proteobacteria	Stenotrophomonas_maltophilia_K279a_uid61647	1	4851126	4386	0.398313		0.345163		0.0331998		0.167807		0.566576		0.0883152
640	Bacteria	Proteobacteria	Teredinibacter_turnerae_T7901_uid59267	1	5193164	4250	0.436706		0.400323		0.028556		0.122824		0.530651		0.0804598
641	Bacteria	Proteobacteria	Thalassolituus_oleivorans_MIL_1_uid195604	1	3920328	3653	0.365453		0.365543		0.0344569		0.14974		0.537477		0.0895795
642	Bacteria	Proteobacteria	Thioalkalimicrobium_cyclicum_ALM1_uid67391	1	1932455	1665	0.281081		0.354701		0.0363248		0.190991		0.5		0.0691824
643	Bacteria	Proteobacteria	Thioalkalivibrio_nitratireducens_DSM_14787_uid184011	1	4002352	3777	0.442944		0.459056		0.0777047		0.170241		0.544323		0.111975
644	Bacteria	Proteobacteria	Thiocystis_violascens_DSM_198_uid74025	1	5017071	4329	0.401709		0.438758		0.0333525		0.163317		0.524752		0.0749646
645	Bacteria	Proteobacteria	Thioflavicoccus_mobilis_8321_uid184343	2	4137521	3561	0.446785		0.520427		0.0735387		0.16091		0.570681		0.118674
646	Bacteria	Proteobacteria	Thiomicrospira_crunogena_XCL_2_uid58183	1	2427734	2196	0.342441		0.271277		0.0199468		0.114754		0.515873		0.0634921
647	Bacteria	Proteobacteria	Tolumonas_auensis_DSM_9187_uid59395	1	3471292	3130	0.365815		0.49869		0.050655		0.142173		0.613483		0.0966292
648	Bacteria	Proteobacteria	Vibrio_cholerae_O1_biovar_El_Tor_N16961_uid57623	2	4033464	3500	0.438		0.3803		0.0241357		0.124286		0.475862		0.062069
649	Bacteria	Proteobacteria	Wigglesworthia_glossinidia_endosymbiont_of_Glossina_morsitans__Yale_colony__uid88075	1	719535	618	0.425566		0.121673		0.00760456		0.079288		0.22449		0
650	Bacteria	Proteobacteria	Xanthomonas_oryzae_PXO99A_uid59131	1	5240075	4975	0.493668		0.237378		0.0223941		0.142111		0.391796		0.0339463
651	Bacteria	Proteobacteria	Xenorhabdus_nematophila_ATCC_19061_uid49133	2	4587917	4409	0.45271		0.360721		0.0320641		0.13858		0.513912		0.096563
652	Bacteria	Proteobacteria	Xylella_fastidiosa_9a5c_uid57849	3	2731750	2831	0.455316		0.231187		0.0116369		0.16284		0.433839		0.0455531
653	Bacteria	Proteobacteria	Yersinia_pestis_CO92_uid57621	4	4829855	3979	0.499372	0.411583	0.479618	0.387723	0.0613991	0.0354078	0.131943	0.13939	0.634286	0.527611	0.0628571	0.0808956
654	Bacteria	Proteobacteria	Baumannia_cicadellinicola_Hc__Homalodisca_coagulata__uid58111	1	686194	595	0.388235	0.0590508	0.242424	0.102435	0.012987	0.0208726	0.0756303	0.0344618	0.266667	0.106784	0.0222222	0.0436219
655	Bacteria	Proteobacteria	Bibersteinia_trehalosi_192_uid193709	1	2407846	2247	0.348465		0.307791		0.0114943		0.117935		0.441509		0.0679245
656	Bacteria	Proteobacteria	Candidatus_Accumulibacter_phosphatis_clade_IIA_UW_1_uid59207	4	5306133	4562	0.362999		0.467995		0.0615942		0.182376		0.480769		0.0805288
657	Bacteria	Proteobacteria	Candidatus_Blochmannia_pennsylvanicus_BPEN_uid58329	1	791654	610	0.516393		0.263492		0.015873		0.0704918		0.162791		0
658	Bacteria	Proteobacteria	Candidatus_Carsonella_ruddii_DC_uid213383	1	174014	207	0.188406		0		0		0.661836		0.0145985		0
659	Bacteria	Proteobacteria	Candidatus_Hamiltonella_defensa_5AT__Acyrthosiphon_pisum__uid59289	2	2169363	2135	0.435129		0.249731		0.022605		0.135831		0.351724		0.0344828
660	Bacteria	Proteobacteria	Candidatus_Hodgkinia_cicadicola_Dsem_uid59311	1	143795	169	0.284024		0.1875		0		0.420118		0.112676		0
661	Bacteria	Proteobacteria	Candidatus_Kinetoplastibacterium_desouzaii_TCC079E_uid189750	1	833125	742	0.349057		0.196911		0.003861		0.0808625		0.166667		0
662	Bacteria	Proteobacteria	Candidatus_Liberibacter_solanacearum_CLso_ZC1_uid61245	1	1258278	1191	0.471033		0.283422		0.030303		0.11251		0.313433		0.0373134
663	Bacteria	Proteobacteria	Candidatus_Midichloria_mitochondrii_IricVA_uid68687	1	1183732	1209	0.502068		0.143328		0.00988468		0.102564		0.217742		0.0241935
664	Bacteria	Proteobacteria	Candidatus_Moranella_endobia_PCVAL_uid197215	1	538203	411	0.542579		0.363229		0.0224215		0.0681265		0.428571		0.0714286
665	Bacteria	Proteobacteria	Candidatus_Nasuia_deltocephalinicola_NAS_ALF_uid214084	1	112091	137	0.335766		0		0		0.343066		0		0
666	Bacteria	Proteobacteria	Candidatus_Pelagibacter_IMCC9063_uid66305	1	1284727	1446	0.2787		0.0992556		0.00496278		0.238589		0.144928		0.0057971
667	Bacteria	Proteobacteria	Candidatus_Portiera_aleyrodidarum_BT_QVLC_uid176374	1	350928	279	0.412186		0.130435		0.00869565		0.121864		0.147059		0
668	Bacteria	Proteobacteria	Candidatus_Puniceispirillum_marinum_IMCC1322_uid47081	1	2753527	2538	0.353428		0.381271		0.0457079		0.157998		0.44389		0.0573566
669	Bacteria	Proteobacteria	Candidatus_Riesia_pediculicola_USDA_uid46841	2	582127	555	0.495495		0.156364		0.0109091		0.0774775		0.139535		0.0232558
670	Bacteria	Proteobacteria	Candidatus_Ruthia_magnifica_Cm__Calyptogena_magnifica__uid58645	1	1160782	976	0.384221		0.165333		0.008		0.213115		0.177885		0.00480769
671	Bacteria	Proteobacteria	Candidatus_Tremblaya_phenacola_PAVE_uid209173	2	171500	175	0.308571		0.166667		0		0.291429		0.117647		0
672	Bacteria	Proteobacteria	Candidatus_Vesicomyosocius_okutanii_HA_uid59427	1	1022154	937	0.377801		0.149718		0.00564972		0.209178		0.132653		0.0102041
673	Bacteria	Proteobacteria	Candidatus_Zinderia_insecticola_CARI_uid52459	1	208564	202	0.257426		0		0		0.232673		0		0
674	Bacteria	Proteobacteria	Dechlorosoma_suillum_PS_uid81439	1	3806980	3442	0.342243		0.398981		0.0458404		0.151075		0.557692		0.103846
675	Bacteria	Proteobacteria	Desulfurivibrio_alkaliphilus_AHT2_uid49487	1	3097763	2620	0.329008		0.575406		0.157773		0.150763		0.572152		0.146835
676	Bacteria	Proteobacteria	Ferrimonas_balearica_DSM_9799_uid53371	1	4279159	3782	0.389476		0.46368		0.0441276		0.161026		0.658456		0.126437
677	Bacteria	Proteobacteria	Frateuria_aurantia_DSM_6220_uid81775	1	3603458	3100	0.413548		0.434477		0.0390016		0.17		0.506641		0.085389
678	Bacteria	Proteobacteria	Hahella_chejuensis_KCTC_2396_uid58483	1	7215267	6740	0.44273		0.371984		0.0385389		0.114095		0.548765		0.0910273
679	Bacteria	Proteobacteria	Halorhodospira_halophila_SL1_uid58473	1	2678452	2407	0.321147		0.630013		0.156533		0.195679		0.785563		0.237792
680	Bacteria	Proteobacteria	Hirschia_baltica_ATCC_49814_uid59365	2	3540114	3187	0.39818		0.413712		0.0488574		0.110449		0.491477		0.0568182
681	Bacteria	Proteobacteria	Kangiella_koreensis_DSM_16069_uid59209	1	2852073	2632	0.359043		0.350265		0.026455		0.116261		0.54902		0.107843
682	Bacteria	Proteobacteria	Ketogulonicigenium_vulgare_Y25_uid59581	3	3288404	3210	0.354206		0.408971		0.0474934		0.205296		0.471927		0.0561457
683	Bacteria	Proteobacteria	Methylotenera_301_uid49469	1	3059871	2764	0.323444		0.248322		0.0111857		0.104197		0.371528		0.0555556
684	Bacteria	Proteobacteria	Rahnella_Y9602_uid62715	3	5614252	5110	0.425049		0.45442		0.0225599		0.148141		0.602378		0.0911493
685	Bacteria	Proteobacteria	secondary_endosymbiont_of_Ctenarytaina_eucalypti_uid172737	1	1441139	917	0.666303		0.373159		0.0196399		0.0763359		0.371429		0.0714286
686	Bacteria	Proteobacteria	secondary_endosymbiont_of_Heteropsylla_cubana_Thao2000_uid172738	1	1121596	576	0.635417		0.311475		0.0218579		0.0798611		0.391304		0
687	Bacteria	Proteobacteria	Sideroxydans_lithotrophicus_ES_1_uid46801	1	3003656	2980	0.264765		0.39924		0.0608365		0.214094		0.456113		0.0673981
688	Bacteria	Proteobacteria	Simiduia_agarivorans_SA1_uid177713	1	4300227	3819	0.362922		0.411255		0.0396825		0.161299		0.469156		0.0762987
689	Bacteria	Proteobacteria	Spiribacter_UAH_SP71_uid226111	1	1926631	1861	0.317034		0.416949		0.0474576		0.234283		0.600917		0.0825688
690	Bacteria	Proteobacteria	syncytium_symbiont_of_Diaphorina_citri_uid213384	2	464857	372	0.365591		0.0808824		0.00735294		0.0430108		0.0625		0
691	Bacteria	Proteobacteria	Thalassobaculum_L2_uid182483	1	1481191	1497	0.646627		0.128099		0.00929752		0.0681363		0.215686		0.0196078
692	Bacteria	Spirochaetes	Borrelia_burgdorferi_B31_uid57581	22	1521208	1388	0.35879		0.459839		0.0863454		0.17147		0.407563		0.0504202
693	Bacteria	Spirochaetes	Brachyspira_intermedia_PWS_A_uid158369	2	3308048	2872	0.441156		0.363852		0.0307814		0.0529248		0.434211		0.105263
694	Bacteria	Spirochaetes	Leptospira_biflexa_serovar_Patoc__Patoc_1__Paris__uid58993	3	3951448	3724	0.367347		0.220029		0.0153509		0.16783		0.3088		0.0288
695	Bacteria	Spirochaetes	Sphaerochaeta_pleomorpha_Grapes_uid82365	1	3590853	3159	0.348528		0.600363		0.126249		0.194049		0.675367		0.190865
696	Bacteria	Spirochaetes	Spirochaeta_smaragdinae_DSM_11293_uid51369	1	4653970	4219	0.300782		0.55398		0.156028		0.210713		0.687289		0.192351
697	Bacteria	Spirochaetes	Treponema_pallidum_Nichols_uid57585	1	1138011	1029	0.298348		0.413681		0.110749		0.212828		0.484018		0.100457
698	Bacteria	Spirochaetes	Turneriella_parva_DSM_21527_uid168321	2	4409302	4139	0.370379	0.355047	0.236138	0.40684	0.0169602	0.0774949	0.178304	0.169731	0.371274	0.481217	0.0271003	0.0993223
699	Bacteria	Synergistetes	Aminobacterium_colombiense_DSM_12261_uid47083	1	1980592	1876	0.257996	0.0447486	0.849174	0.135141	0.452479	0.0526947	0.19403	0.0505005	0.807692	0.136076	0.282967	0.0650843
700	Bacteria	Synergistetes	Anaerobaculum_mobile_DSM_13181_uid168323	1	2160700	2017	0.227566		0.823529		0.444444		0.207238		0.813397		0.26555
701	Bacteria	Synergistetes	Synergistetes_bacterium_SGP1_uid197182	1	2728333	1431	0.575821		0.75		0.299757		0.100629		0.777778		0.319444
702	Bacteria	Synergistetes	Thermanaerovibrio_acidaminovorans_DSM_6589_uid41925	1	1848474	1730	0.471676		0.840686		0.345588		0.449711		0.848329		0.304627
703	Bacteria	Synergistetes	Thermovirga_lienii_DSM_17291_uid77129	2	1999646	1875	0.250667	0.356745	0.846809	0.82204	0.453191	0.399092	0.194667	0.229255	0.843836	0.818206	0.290411	0.2926
704	Bacteria	Thermodesulfobacteria	Thermodesulfatator_indicus_DSM_15286_uid68285	1	2322224	2194	0.319508	0.140638	0.583452	0.0371197	0.339515	0.0641309	0.276664	0.116677	0.551895	0.0258162	0.158155	0.0184095
705	Bacteria	Thermodesulfobacteria	Thermodesulfobacterium_OPB45_uid68283	1	1634377	1596	0.244987		0.41688		0.237852		0.222431		0.383099		0.115493
706	Bacteria	Thermotogae	Fervidobacterium_pennivorans_DSM_9078_uid78143	1	2166381	1946	0.237924		0.885529		0.520518		0.175231		0.803519		0.246334
707	Bacteria	Thermotogae	Kosmotoga_olearia_TBF_19_5_1_uid59205	1	2302126	2118	0.30406		0.874224		0.448758		0.241737		0.802734		0.236328
708	Bacteria	Thermotogae	Marinitoga_piezophila_KA3_uid81629	2	2244793	2046	0.245846		0.922465		0.471173		0.210655		0.821346		0.204176
709	Bacteria	Thermotogae	Mesotoga_prima_MesG1_Ag_4_2_uid52599	2	2975953	2574	0.356643		0.87146		0.445534		0.228827		0.791171		0.249576
710	Bacteria	Thermotogae	Petrotoga_mobilis_SJ95_uid58747	1	2169548	1898	0.272919		0.812741		0.364865		0.174394		0.755287		0.208459
711	Bacteria	Thermotogae	Thermosipho_africanus_TCF52B_uid59095	1	2016657	1953	0.216078		0.78673		0.440758		0.271377		0.839623		0.292453
712	Bacteria	Thermotogae	Thermotoga_maritima_MSB8_uid202924	1	1869612	1891	0.218932	0.264629	0.859903	0.859007	0.538647	0.461465	0.342676	0.234985	0.865741	0.811346	0.32716	0.25207
713	Bacteria	unclassified:Bacteria	candidate_division_SR1_bacterium_RAAC1_SR1_1_uid230714	1	1177760	1059	0.357885	0.0472102	0.0105541	0.0422278	0	0.0530691	0.0349386	0.0545618	0	0.0328272	0	0.0409738
714	Bacteria	unclassified:Bacteria	candidate_division_WWE3_bacterium_RAAC2_WWE3_1_uid230713	1	878109	871	0.334099		0.175258		0.0584192		0.159587		0.323741		0.0791367
715	Bacteria	unclassified:Bacteria	Candidatus_Cloacamonas_acidaminovorans_Evry_uid62959	1	2246820	1788	0.302573		0.476895		0.0813309		0.256711		0.3878		0.0936819
716	Bacteria	unclassified:Bacteria	Candidatus_Methylomirabilis_oxyfera_uid161981	1	2752854	3019	0.310699		0.486141		0.183369		0.161312		0.517454		0.12731
717	Bacteria	unclassified:Bacteria	Candidatus_Saccharibacteria_bacterium_RAAC3_TM7_1_uid230715	1	845464	920	0.369565		0.341176		0.0764706		0.158696		0.616438		0.0958904
718	Bacteria	unclassified:Bacteria	Candidatus_Saccharobacterium_alaburgensis_uid203361	1	1013781	1031	0.353055		0.296703		0.0604396		0.174588		0.588889		0.0944444
719	Bacteria	unclassified:Bacteria	Halyomorpha_halys_symbiont_uid222821	1	1151074	825	0.561212		0.349892		0.0215983		0.0884848		0.383562		0.0273973
720	Bacteria	unclassified:Bacteria	Thermobaculum_terrenum_ATCC_BAA_798_uid42011	2	3101581	2832	0.349576		0.721212		0.29596		0.138418		0.795918		0.272959
